# Supplementary material for: Association between atherogenic coefficient and depression in US adults: a cross-sectional study with data from National Health and Nutrition Examination Survey 2005–2018
Source: PubMed Central journal article supplement (PMC10619029; doi:10.1136/bmjopen-2023-074001), 2023-10-29
Supplement: bmjopen-2023-074001.draft_revisions.pdf [file bmjopen-2023-074001.draft_revisions.pdf]

# BMJ Open

BMJ Open is committed to open peer review. As part of this commitment we make the peer review history of every article we publish publicly available.

When an article is published we post the peer reviewers' comments and the authors' responses online. We also post the versions of the paper that were used during peer review. These are the versions that the peer review comments apply to.

The versions of the paper that follow are the versions that were submitted during the peer review process. They are not the versions of record or the final published versions. They should not be cited or distributed as the published version of this manuscript.

BMJ Open is an open access journal and the full, final, typeset and author-corrected version of record of the manuscript is available on our site with no access controls, subscription charges or pay-per-view fees (<http://bmjopen.bmj.com>).

If you have any questions on BMJ Open's open peer review process please email [info.bmjopen@bmj.com](mailto:info.bmjopen@bmj.com)

# BMJ Open

## Association between atherogenic coefficient and depression in US adults: a cross-sectional study with data from National Health and Nutrition Examination Survey 2005-2018

|                               |                                                                                                                                                                                                                                                                                                                                                                            |
|-------------------------------|----------------------------------------------------------------------------------------------------------------------------------------------------------------------------------------------------------------------------------------------------------------------------------------------------------------------------------------------------------------------------|
| Journal:                      | <i>BMJ Open</i>                                                                                                                                                                                                                                                                                                                                                            |
| Manuscript ID                 | bmjopen-2023-074001                                                                                                                                                                                                                                                                                                                                                        |
| Article Type:                 | Original research                                                                                                                                                                                                                                                                                                                                                          |
| Date Submitted by the Author: | 24-Mar-2023                                                                                                                                                                                                                                                                                                                                                                |
| Complete List of Authors:     | Zhang, Lu; Shandong University of Traditional Chinese Medicine<br>Yin, Jiahui; Shandong University of Traditional Chinese Medicine<br>Sun, Haiyang; Guangzhou University of Traditional Chinese Medicine<br>Yang, Jiguo; Shandong University of Traditional Chinese Medicine<br>Liu, Yuanxiang; Affiliated Hospital of Shandong University of Traditional Chinese Medicine |
| Keywords:                     | Adult psychiatry < PSYCHIATRY, Depression & mood disorders < PSYCHIATRY, Risk Factors                                                                                                                                                                                                                                                                                      |
|                               |                                                                                                                                                                                                                                                                                                                                                                            |

SCHOLARONE™  
Manuscripts

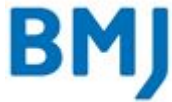

I, the Submitting Author has the right to grant and does grant on behalf of all authors of the Work (as defined in the below author licence), an exclusive licence and/or a non-exclusive licence for contributions from authors who are: i) UK Crown employees; ii) where BMJ has agreed a CC-BY licence shall apply, and/or iii) in accordance with the terms applicable for US Federal Government officers or employees acting as part of their official duties; on a worldwide, perpetual, irrevocable, royalty-free basis to BMJ Publishing Group Ltd ("BMJ") its licensees and where the relevant Journal is co-owned by BMJ to the co-owners of the Journal, to publish the Work in this journal and any other BMJ products and to exploit all rights, as set out in our [licence](#).

The Submitting Author accepts and understands that any supply made under these terms is made by BMJ to the Submitting Author unless you are acting as an employee on behalf of your employer or a postgraduate student of an affiliated institution which is paying any applicable article publishing charge ("APC") for Open Access articles. Where the Submitting Author wishes to make the Work available on an Open Access basis (and intends to pay the relevant APC), the terms of reuse of such Open Access shall be governed by a Creative Commons licence – details of these licences and which [Creative Commons](#) licence will apply to this Work are set out in our licence referred to above.

Other than as permitted in any relevant BMJ Author's Self Archiving Policies, I confirm this Work has not been accepted for publication elsewhere, is not being considered for publication elsewhere and does not duplicate material already published. I confirm all authors consent to publication of this Work and authorise the granting of this licence.

1  
2  
3  
4 **Association between atherogenic coefficient and depression in US**  
5  
6 **adults: a cross-sectional study with data from National Health and**  
7  
8 **Nutrition Examination Survey 2005-2018**  
9  
10

11 **Lu Zhang<sup>a</sup>, Jiahui Yin<sup>b</sup>, Haiyang Sun<sup>c</sup>, Jiguo Yang<sup>d\*</sup>, Yuanxiang Liu<sup>e\*</sup>,**

12 *<sup>a</sup>Shandong University of Traditional Chinese Medicine, Jinan, China.*

13 *<sup>b</sup>Shandong University of Traditional Chinese Medicine, Jinan, China.*

14 *<sup>c</sup>Guangzhou University of Traditional Chinese Medicine, Guangzhou, China.*

15 *<sup>d</sup>Shandong University of Traditional Chinese Medicine, Jinan, China.*

16 *<sup>e</sup>Affiliated Hospital of Shandong University of Traditional Chinese Medicine, Jinan,*  
17 *China.*

18 \* Correspondence: Yuanxiang Liu: lyxlwtg001@163.com;

19 Address: No.16369 Jingshi Road, Lixia District, Jinan, China  
20  
21  
22  
23  
24  
25  
26  
27  
28  
29  
30  
31  
32  
33  
34  
35  
36  
37  
38  
39  
40  
41  
42  
43  
44  
45  
46  
47  
48  
49  
50  
51  
52  
53  
54  
55  
56  
57  
58  
59  
60

## ABSTRACT

**Objective:** There are strong comorbidities between depression and cardiovascular disease.

The atherogenic coefficient (AC) is an important index that is linked to cardiovascular disease and has been suggested to play a role in depression. Therefore, we investigated the association between AC and depression among adult Americans.

**Design:** Cross-sectional study.

**Setting:** The National Health and Nutrition Examination Survey (2005-2018).

**Participants:** A total of 32502 participants aged 20 years or older who had complete information for AC and depression were included in this study.

**Primary and secondary outcome measures:** Whether the patient suffered from depression. AC values were calculated from cholesterol and high-density lipoproteins. Covariates including age, sex, race/ethnicity, body mass index, poverty-income ratio, educational level, marital status, hypertension, diabetes mellitus, alcohol intake, smoking status, physical activity, and glycosylated hemoglobin level were adjusted in multivariate logistic regression models.

**Results:** After adjusting for potential confounders, a single unit increase in AC was associated with a 4% increase in the prevalence of depression (hazard ratio =1.04, 95% confidence interval =1.02-1.07,  $P = 0.002$ ). The relationship between AC and depression was more obvious in females.

**Conclusions:** The AC is positively associated with depression.

**Keywords:** atherosclerosis, depression, nutrition surveys, adult

**Strengths and Limitations:** 1. The quality and scale of the National Health and Nutrition Examination Survey database and the rigour of its measures ensure the statistical power and reliability of our results. 2. A wide range of sociodemographic, lifestyle and physical health covariates were adjusted for, reducing the possibility of residual confounding. 3. This study was limited by its cross-sectional design, and no causal relationships could be determined. 4. The PHQ-9 is a proven, simple, and effective tool for identifying the severity of depressive symptoms, but it is not a diagnostic tool for Major Depressive Disorder (MDD).

## INTRODUCTION

Depression is a clinically common emotional state characterized by a persistent feeling of sadness or inability to experience pleasure, accompanied by deficits in daily functioning [1]. In 2008, the World Health Organization (WHO) ranked major depression as the third leading cause of the global burden of disease and projected that it would be the number one cause by 2030 [2]. More than 300 million people worldwide suffer from major depressive disorder (MDD) [3], and this number has increased over the past decade [4]. Depression can cause various adverse events, seriously endangering lives and global health [5,6]. Current antidepressant treatments are effective, but there are many side effects; for example, antidepressants may increase suicidal thoughts in some people [7]. Evidence supports screening for depression and providing early intervention [8]. Therefore, it is necessary to explore the factors related to depression. Abnormal lipid metabolism is often observed in patients with depression. Some studies have shown that changes in circulating lipid concentrations may be associated with depression [9]. Lipids play a role in depression via inflammation and metabolic changes. On one hand, activation of the proinflammatory response leads to a decrease in high-density lipoprotein (HDL) and phospholipids and a compensatory increase in phospholipid-rich low-density lipoprotein (LDL), which in turn slows total cholesterol (TC) metabolism and affects neurotransmitters and neural circuits that contribute to behavioral symptoms of depression [10]. On the other hand, cytokine signaling in adipose tissue, particularly tumor necrosis factor (TNF), promotes metabolic dysregulation and increases depression [11].

The pathogenesis of atherosclerosis is based on the lipid theory, and the explanation is related to excess cholesterol being the sole cause of lipid deposition in the arterial wall [12]. The atherogenic coefficient (AC) is an important index for assessing the degree of atherosclerosis, which is calculated as  $(TC - HDL)/HDL$  [13]. Nunes et al. found that AC was elevated in patients with MDD and bipolar disorder and was also associated with cardiovascular disease (CVD) [14]. AC and CVD can be controlled by statins and other cardiovascular drugs [15,16]. Exploring the role of AC

1  
2  
3  
4 in depression may be beneficial for the treatment of depression and depression  
5 combined with CVD.  
6

7 To the best of our knowledge, the role that AC plays in depression is still  
8 unclear. Therefore, we used data from the National Health and Nutrition Examination  
9 Survey (NHANES) database to explore the association of AC with depression in  
10 adults.  
11  
12  
13  
14

## 15 16 17 **METHODS**

### 18 19 **Study design and participants**

20  
21 Data of the participants in this study were obtained from the NHANES database, a  
22 major program conducted by the Centers for Disease Control and Prevention (CDC)  
23 to assess the health and nutritional status of 5,000 adults and children in the US  
24 annually [17]. The NHANES database contains demographic, dietary, examination,  
25 laboratory, and questionnaire data. The National Center for Health Statistics (NCHS)  
26 Research Ethics Review Board (ERB) authorized the NHANES study protocols.  
27 Further information regarding the NHANES data can be obtained from its official  
28 website (<http://www.cdc.gov/nchs/nhanes.htm>).  
29  
30  
31  
32  
33  
34  
35

36  
37 Participants in our study were screened according to the following inclusion  
38 criteria: 1) aged 20 years or above, and 2) participation in laboratory tests on an empty  
39 stomach. The exclusion criteria were as follows: 1) incomplete Patient Health  
40 Questionnaire-9 (PHQ-9) and 2) no data on total cholesterol or high-density  
41 lipoprotein levels.  
42  
43  
44  
45

### 46 47 **Assessment of depression**

48 The PHQ-9 is used to assess depression. The PHQ-9 contains nine items that capture  
49 the frequency of depressive symptoms such as: appetite problems, fatigue, sleep  
50 difficulties, psychomotor retardation or agitation, concentration problems, lack of  
51 interest, depressed mood, feelings of worthlessness, and suicidal ideation. It is now  
52 widely accepted as an accurate and reliable method for screening depression [18,19].  
53 Each question is scored from '0' (not at all) to '3' (nearly every day), with a total  
54 score of 0–27 where a score  $\geq 10$  is considered clinically relevant depression (CRD)  
55  
56  
57  
58  
59  
60

1  
2  
3  
4 [20]. PHQ-9 sensitivity compared with semi-structured diagnostic interviews was  
5 greater than that in previous conventional meta-analyses that combined reference  
6 standards. A cutoff score of 10 or above maximized the combined sensitivity and  
7 specificity overall and for subgroups [21].  
8  
9

### 11 **Assessment of AC**

12 Fasting blood was drawn from individuals aged  $\geq 20$  years, and the blood samples  
13 were processed, stored, and shipped to the Johns Hopkins University Lipoprotein  
14 Assay Laboratory at the Ambulator-Testing Center laboratory. HDL levels were  
15 measured directly in the serum. The apolipoprotein B (apoB)-containing lipoproteins  
16 in the specimen were reacted with a blocking reagent that rendered them non-reactive  
17 with the enzymatic cholesterol reagent under the assay conditions. Reagents were  
18 purchased from Roche/Boehringer-Mannheim Diagnostics (Mannheim, Germany).  
19 The method uses sulfated alpha-cyclodextrin in the presence of  $Mg^{+2}$ , which forms  
20 complexes with apoB-containing lipoproteins, and polyethylene glycol-coupled  
21 cholesteryl esterase and cholesterol oxidase for HDL cholesterol measurement. HDL  
22 cholesterol data collected from participants in 2005-2006 were adjusted using the  
23 following equation: corrected HDL = (Solomon Park assigned HDL value)  $\times$   
24 (participant HDL). Total cholesterol was measured enzymatically in the serum or  
25 plasma in a series of coupled reactions that hydrolyze cholesteryl esters and oxidize  
26 the 3-OH group of cholesterol. All the information can be obtained from  
27 <https://wwwn.cdc.gov/Nchs/Nhanes/>.  
28  
29  
30  
31  
32  
33  
34  
35  
36  
37  
38  
39  
40  
41  
42  
43

### 44 **Assessment of covariates**

45 Covariates in this study, including body mass index (BMI), alcohol intake, physical  
46 activity, and glycosylated hemoglobin, were used as continuous variables. BMI was  
47 measured as weight (kg) divided by height (m) squared ( $<25.0$  kg/m<sup>2</sup> indicating  
48 normal, 25.0 to  $<30.0$  kg/m<sup>2</sup> indicating overweight,  $\geq 30.0$  kg/m<sup>2</sup> indicating obese).  
49 Alcohol intake (the mean alcohol intake from the first and second dietary surveys was  
50 extracted, in which alcohol intake was defined as the alcohol intake on a single day  
51 for participants who consumed alcohol on a total of one day ever). Physical activity  
52 was self-reported by participants as either inactive, moderate, or vigorous. Categorical  
53  
54  
55  
56  
57  
58  
59  
60



1  
2  
3  
4 variables included age (20–40 years, 40–60 years,  $\geq 60$  years), sex (male or female),  
5  
6 and race/ethnicity (non-Hispanic white, non-Hispanic black, Mexican American,  
7  
8 other Hispanic, or other race/multiple races). The poverty-income ratio (PIR) was  
9  
10 defined as the ratio of family income to poverty threshold ( $< 1$  indicating an income  
11  
12 below the poverty threshold and  $\geq 1$  indicating an income above the poverty threshold;  
13  
14 the latter category was further divided into two groups: 1.00 to  $< 2.00$  and  $\geq 2.00$ ).  
15  
16 Education level was categorized as high school not completed, high school  
17  
18 completed, or high school graduate and some college or associated degrees pursued.  
19  
20 Marital status was defined as married/living with partner or  
21  
22 widowed/divorced/separated/never married. Hypertension (HTN) (defined as systolic  
23  
24 blood pressure  $\geq 140$  mmHg or diastolic blood pressure  $\geq 90$  mmHg) was determined  
25  
26 using three blood pressure measurements at different times, an existing diagnosis, or  
27  
28 evidence of an existing antihypertensive medication regimen. Diabetes mellitus (DM)  
29  
30 was defined as either taking glucose-lowering therapies, a glycated hemoglobin  
31  
32 (HbA1c) concentration of  $\geq 6.5\%$ , use of anti-diabetic medication, oral glucose  
33  
34 tolerance test (OGTT)  $\geq 11.1$  mmol/L, fasting plasma glucose  $\geq 7.0$  mmol/L, or  
35  
36 random blood glucose  $\geq 11.1$  mmol/L. Smoking status was defined as people who do  
37  
38 not smoke,  $< 100$  cigarettes during lifetime; people who formerly smoked, not  
39  
40 currently smoking but  $\geq 100$  cigarettes consumed previously; and people who smoke  
41  
42  $\geq 100$  cigarettes every day or some days.

### 43 **Statistical analysis**

44  
45 The main concern was whether AC is associated with depression after adjusting for  
46  
47 other factors that may influence depression. Continuous variables are expressed as  
48  
49 mean  $\pm$  standard deviation, and categorical variables are expressed as percentages.  
50  
51 The  $\chi^2$  test was used to compare categorical variables between groups, one-way  
52  
53 analysis of variance was used to compare normally distributed variables between  
54  
55 groups, and Kruskal-Wallis H test was used to compare variables with a skewed  
56  
57 distribution between groups. Multivariate logistic regression analysis was performed  
58  
59 to evaluate the independent association between AC and depression. The participants  
60  
were divided into four groups based on AC:  $< 1.9310$ ,  $1.9310$  to  $< 2.6695$ ,  $2.6695$  to  $<$

1  
2  
3  
4 3.6430, and  $\geq 3.6430$ . We used three levels of adjustment: Model 1 was adjusted for  
5 age, sex, and race/ethnicity; Model 2 was adjusted for the variables in Model 1 plus  
6 BMI, PIR, educational level, and marital status; and Model 3 was adjusted for the  
7 variables in Model 2 plus HTN, DM, alcohol intake, smoking status, physical activity,  
8 and glycosylated hemoglobin. The imputation of missing data was conducted using  
9 the missForest R package, which is a random forest-based technique that is highly  
10 computationally efficient for high-dimensional data consisting of both categorical and  
11 continuous predictors; the missing values are presented in the table (Table S1) [22].  
12  
13  
14  
15  
16  
17  
18

19 All analyses were performed using R software (The R Foundation, Vienna,  
20 Austria) and Empower (X&Y Solutions, Boston, MA, USA). Statistical significance  
21 was defined as a two-sided *P*-value  $<0.05$ .  
22  
23  
24  
25  
26

## 27 RESULTS

### 28 Participant characteristics

29 In this study, 32,502 participants were included (Figure 1). Table 1 shows the  
30 characteristics of the participants according to their AC. There were statistically  
31 significant differences in age, sex, educational level, race/ethnicity, marital status,  
32 PIR, alcohol intake, smoking status, physical activity, BMI, HTN, DM, HbA1c,  
33 cholesterol, and HDL between the different AC groups ( $P < 0.05$ ).  
34  
35  
36  
37  
38  
39

40 Participants with the lowest AC in Q1 ( $< 1.9310$ ) were likely to be female,  
41 younger, more educated, married or cohabitating, wealthier, less physically active,  
42 smoked less, consumed more alcohol, had no DM or HTN, and lower HbA1c levels.  
43  
44  
45

46 By contrast, participants with the highest AC in Q4 ( $> 3.6430$ ) were likely to  
47 be male,  $> 40$  years old, more highly educated, non-Hispanic White, married or  
48 cohabitating, wealthier, consumed less alcohol, never smoked, inactive and obese, had  
49 HTN, and higher HbA1c and cholesterol levels.  
50  
51  
52  
53  
54  
55  
56  
57  
58  
59  
60

**Table 1.** Characteristics of the study population, using National Health and Nutrition Examination Survey data from 2005–2018 (N = 32,502).

| Characteristic                  | Overall        | Atherogenic coefficient quartiles† |                               |                               |                         | p-value  |
|---------------------------------|----------------|------------------------------------|-------------------------------|-------------------------------|-------------------------|----------|
|                                 |                | Q1<br>( $< 1.9310$ )               | Q2<br>(1.9310 to $< 2.6695$ ) | Q3<br>(2.6695 to $< 3.6430$ ) | Q4<br>( $\geq 3.6430$ ) |          |
| Sample size, <i>n</i> (%)       | 32,502 (100)   | 8,126 (25.00)                      | 8,124 (24.99)                 | 8,125 (25.00)                 | 8,127 (25.00)           |          |
| Male, <i>n</i> (%)              | 15,954 (49.09) | 2,882 (35.47)                      | 3,496 (43.03)                 | 4,322 (53.19)                 | 5,254 (64.65)           | $<0.001$ |
| Age, <i>y</i> , <i>n</i> (%)    |                |                                    |                               |                               |                         | $<0.001$ |
| 20 to $< 40$                    | 10,857 (33.40) | 3,062 (37.68)                      | 2,753 (33.89)                 | 2,517 (30.98)                 | 2,525 (31.07)           |          |
| 40 to $< 60$                    | 10,632 (32.71) | 2,089 (25.71)                      | 2,423 (29.83)                 | 2,856 (35.15)                 | 3,264 (40.16)           |          |
| $\geq 60$                       | 11,013 (33.88) | 2,975 (36.61)                      | 2,948 (36.29)                 | 2,752 (33.87)                 | 2,338 (28.77)           |          |
| Educational level, <i>n</i> (%) |                |                                    |                               |                               |                         | $<0.001$ |
| $<$ High school                 | 7,841 (24.14)  | 1,625 (20.01)                      | 1,816 (22.36)                 | 2,055 (25.30)                 | 2,345 (28.89)           |          |
| Completed high school           | 7,486 (23.05)  | 1,724 (21.23)                      | 1,838 (22.64)                 | 1,965 (24.19)                 | 1,959 (24.14)           |          |
| $>$ High school                 | 17,152 (52.81) | 4,770 (58.75)                      | 4,466 (55.00)                 | 4,104 (50.52)                 | 3,812 (46.97)           |          |
| Race/ethnicity, <i>n</i> (%)    |                |                                    |                               |                               |                         | $<0.001$ |
| Non-Hispanic White              | 14,112 (43.42) | 3,516 (43.27)                      | 3,536 (43.53)                 | 3,461 (42.60)                 | 3,599 (44.28)           |          |
| Non-Hispanic Black              | 6,713 (20.65)  | 2,212 (27.22)                      | 1,803 (22.19)                 | 1,550 (19.08)                 | 1,148 (14.13)           |          |
| Mexican American                | 5,174 (15.92)  | 925 (11.38)                        | 1,159 (14.27)                 | 1,466 (18.04)                 | 1,624 (19.98)           |          |
| Other Hispanic                  | 3,109 (9.57)   | 583 (7.17)                         | 752 (9.26)                    | 843 (10.38)                   | 931 (11.46)             |          |
| Other race/multiple races       | 3,394 (10.44)  | 890 (10.95)                        | 874 (10.76)                   | 805 (9.91)                    | 825 (10.15)             |          |

|    |                                     |                |               |               |               |               |        |
|----|-------------------------------------|----------------|---------------|---------------|---------------|---------------|--------|
| 1  |                                     |                |               |               |               |               |        |
| 2  |                                     |                |               |               |               |               |        |
| 3  |                                     |                |               |               |               |               |        |
| 4  | Marital status, <i>n</i> (%)        |                |               |               |               |               | <0.001 |
| 5  |                                     |                |               |               |               |               |        |
| 6  | Married/Living with partner         | 19,532 (60.12) | 4,363 (53.71) | 4,782 (58.89) | 5,067 (62.42) | 5,320 (65.48) |        |
| 7  |                                     |                |               |               |               |               |        |
| 8  |                                     |                |               |               |               |               |        |
| 9  | Widowed/Divorced/Separated/         |                |               |               |               |               |        |
| 10 |                                     | 12,954 (39.88) | 3,761 (46.29) | 3,338 (41.11) | 3,051 (37.58) | 2,804 (34.52) |        |
| 11 | Never married                       |                |               |               |               |               |        |
| 12 |                                     |                |               |               |               |               |        |
| 13 |                                     |                |               |               |               |               |        |
| 14 | PIR, <i>n</i> (%)                   |                |               |               |               |               | <0.001 |
| 15 |                                     |                |               |               |               |               |        |
| 16 | < 1.00                              | 6,103 (20.46)  | 1,425 (19.08) | 1,484 (19.90) | 1,478 (19.90) | 1,716 (22.97) |        |
| 17 |                                     |                |               |               |               |               |        |
| 18 | 1.00 to <2.00                       | 8,001 (26.83)  | 1,857 (24.86) | 1,920 (25.74) | 2,075 (27.94) | 2,149 (28.76) |        |
| 19 |                                     |                |               |               |               |               |        |
| 20 | ≥2.00                               | 15,722 (52.71) | 4,188 (56.06) | 4,055 (54.36) | 3,873 (52.15) | 3,606 (48.27) |        |
| 21 |                                     |                |               |               |               |               |        |
| 22 |                                     |                |               |               |               |               |        |
| 23 |                                     |                |               |               |               |               |        |
| 24 | Alcohol intake, <i>g/day</i> , mean |                |               |               |               |               |        |
| 25 |                                     |                |               |               |               |               |        |
| 26 |                                     | 7.80 (19.98)   | 10.29 (23.26) | 7.50 (19.02)  | 6.59 (17.43)  | 6.88 (19.61)  | <0.001 |
| 27 | (SD)                                |                |               |               |               |               |        |
| 28 |                                     |                |               |               |               |               |        |
| 29 |                                     |                |               |               |               |               |        |
| 30 | Smoking status, <i>n</i> (%)        |                |               |               |               |               | <0.001 |
| 31 |                                     |                |               |               |               |               |        |
| 32 | Never smoked                        | 17,828 (54.88) | 4,751 (58.50) | 4,626 (56.89) | 4,470 (55.03) | 3,981 (49.02) |        |
| 33 |                                     |                |               |               |               |               |        |
| 34 | Former smoker                       | 7,993 (24.61)  | 1,888 (23.25) | 2,003 (24.67) | 2,099 (25.84) | 2,003 (24.66) |        |
| 35 |                                     |                |               |               |               |               |        |
| 36 | Current smoker                      | 6,664 (20.51)  | 1,483 (18.26) | 1,489 (18.34) | 1,554 (19.13) | 2,138 (26.32) |        |
| 37 |                                     |                |               |               |               |               |        |
| 38 |                                     |                |               |               |               |               |        |
| 39 |                                     |                |               |               |               |               |        |
| 40 | Physical activity, <i>n</i> (%)     |                |               |               |               |               | <0.001 |
| 41 |                                     |                |               |               |               |               |        |
| 42 | Inactive                            | 14,825 (25.20) | 3,302 (46.44) | 3,597 (51.02) | 3,850 (54.11) | 4,076 (57.22) |        |
| 43 |                                     |                |               |               |               |               |        |
| 44 | Moderate                            | 7,339 (25.84)  | 1,846 (25.96) | 1,855 (26.31) | 131 (26.44)   | 1,757 (24.66) |        |
| 45 |                                     |                |               |               |               |               |        |
| 46 | Vigorous                            | 2,094 (7.37)   | 6,01 (8.45)   | 534 (7.57)    | 487 (6.84)    | 472 (6.63)    |        |
| 47 |                                     |                |               |               |               |               |        |
| 48 | Both moderate and vigorous          | 4142 (14.58)   | 1362 (19.15)  | 1064 (15.09)  | 897 (12.61)   | 819 (11.50)   |        |
| 49 |                                     |                |               |               |               |               |        |
| 50 |                                     |                |               |               |               |               |        |
| 51 | BMI, kg/m <sup>2</sup> , mean (SD)  | 29.29 (6.96)   | 26.59 (6.56)  | 28.99 (7.12)  | 30.36 (6.88)  | 31.20 (6.37)  | <0.001 |
| 52 |                                     |                |               |               |               |               |        |
| 53 |                                     |                |               |               |               |               |        |
| 54 | HTN, <i>n</i> (%)                   | 13,940 (42.89) | 3,211 (39.52) | 3,414 (42.02) | 3,586 (44.14) | 3,729 (45.88) | <0.001 |
| 55 |                                     |                |               |               |               |               |        |
| 56 |                                     |                |               |               |               |               |        |
| 57 |                                     |                |               |               |               |               |        |
| 58 | DM, <i>n</i> (%)                    | 6,152 (19.28)  | 1,322 (16.72) | 1,411 (17.79) | 1,597 (19.97) | 1,822 (22.56) | <0.001 |
| 59 |                                     |                |               |               |               |               |        |
| 60 |                                     |                |               |               |               |               |        |

|                                    |             |             |             |             |             |        |
|------------------------------------|-------------|-------------|-------------|-------------|-------------|--------|
| HbA1c, %, mean (SD)                | 5.76 (1.08) | 5.57 (0.86) | 5.68 (0.94) | 5.79 (1.06) | 5.99 (1.36) | <0.001 |
| Cholesterol, mmol/L, mean (SD)     | 5.00 (1.09) | 4.41 (0.91) | 4.76 (0.91) | 5.08 (0.92) | 5.76 (1.12) | <0.001 |
| HDL cholesterol, mmol/L, mean (SD) | 1.37 (0.42) | 1.80 (0.43) | 1.45 (0.29) | 1.24 (0.23) | 1.01 (0.21) | <0.001 |
| Depression, <i>n</i> (%)           | 2871 (8.83) | 620 (7.63)  | 649 (7.99)  | 762 (9.38)  | 840 (10.34) | <0.001 |

Abbreviations: DM, diabetes mellitus; BMI, body mass index; HbA1c, glycosylated hemoglobin; HDL, high-density lipoprotein; HTN, hypertension; PIR, poverty-income ratio (ratio of family income to poverty threshold); SD, standard deviation.

### Association between AC and depression

In the fully adjusted model, we observed a linear relationship between AC and depression (Figure 2). The results of the multivariate logistic regression analysis are presented in Table 2. AC was positively correlated with depression in the crude model (odds ratio [OR]= 1.09, 95% confidence interval [CI]:1.07-1.12,  $P < 0.0001$ ). After adjusting for confounders, a significant association between AC and depression was detected in Models 1-3. In Model 3, all variables were adjusted; for every 1 unit increase in AC, the incidence of depression increased by 4% (OR = 1.04, 95% CI = 1.02–1.07,  $P = 0.002$ ).

**Table 2.** Associations of the atherogenic coefficient with depression (n = 32,502).

|                                 | Crude Modela              |                 | Model 1b                     |                 | Model 2c                     |                 | Model 3d                     |                 |
|---------------------------------|---------------------------|-----------------|------------------------------|-----------------|------------------------------|-----------------|------------------------------|-----------------|
|                                 | OR (95%<br>CI)            | <i>p</i> -value | OR (95%<br>CI)               | <i>p</i> -value | OR (95%<br>CI)               | <i>p</i> -value | OR (95%<br>CI)               | <i>p</i> -value |
| Per 1 increase                  | 1.09<br>(1.07,1.12)       | <0.001          | 1.13<br>(1.10,1.16)          | <0.001          | 1.08<br>(1.05,1.11)          | <0.001          | 1.04<br>(1.02,1.07)          | 0.002           |
| Quartiles                       |                           |                 |                              |                 |                              |                 |                              |                 |
| Q1 (AC: <<br>1.9310 )           | McCarron et<br>al. (2021) |                 | McCarron<br>et al.<br>(2021) |                 | McCarron<br>et al.<br>(2021) |                 | McCarron<br>et al.<br>(2021) |                 |
| Q2 (AC: 1.9310<br>to < 2.6695 ) | 1.05<br>(0.94,1.18)       | 0.394           | 1.09<br>(0.97,1.22)          | 0.148           | 1.00<br>(0.89,1.12)          | 0.958           | 0.99<br>(0.88,1.11)          | 0.836           |
| Q3 (AC: 2.6695<br>to < 3.6430 ) | 1.25<br>(1.12,1.40)       | <0.001          | 1.37<br>(1.22,1.53)          | <0.001          | 1.18<br>(1.05,1.32)          | 0.006           | 1.13<br>(1.01,1.28)          | 0.040           |
| Q4 (AC: ≥<br>3.6430 )           | 1.40<br>(1.25,1.56)       | <0.001          | 1.63<br>(1.46,1.83)          | <0.001          | 1.30<br>(1.15,1.46)          | <0.001          | 1.15<br>(1.02,1.30)          | 0.026           |
| <i>p</i> for trend              | <0.0001                   |                 | <0.0001                      |                 | <0.0001                      |                 | 0.0063                       |                 |

Abbreviations: AC, atherogenic coefficient.

aModel 1: Adjusted for age, sex, and race/ethnicity.

bModel 2: Adjusted for the variables in Model 1 plus body mass index, poverty-income ratio, educational level, and marital status.

cModel 3: Adjusted for the variables in Model 2 plus hypertension, diabetes mellitus, alcohol intake, smoking status, physical activity, and glycosylated hemoglobin.

After adjusting for age, sex, race/ethnicity, BMI, PIR, educational level, marital status, HTN, DM, alcohol intake, smoking status, and physical activity, compared with participants in the first quartile (AC < 1.9310), the second group (1.9310 to < 2.6695, OR = 0.99, 95% CI = 0.88– 1.11, *P* = 0.836), the third group (2.6695 to < 3.6430, OR = 1.13, 95% CI = 1.01– 1.28, *P* = 0.040), and the fourth

1  
2  
3  
4 group ( $\geq 3.6430$ , OR = 1.15, 95% CI = 1.02– 1.30,  $P = 0.026$ ) had an increased  
5 prevalence of depression ( $P$  for trend was significant in all the models).  
6

7  
8 Furthermore, regarding the interaction between sex and the relationship  
9 between AC and depression, the relationship was more significant in females (OR =  
10 1.07, 95% CI = 1.03–1.11,  $P$  for interaction = 0.036).  
11  
12  
13

## 14 15 **DISCUSSION**

16  
17 This cross-sectional study showed an association between AC and depression in  
18 adults in the United States. After adjusting for covariates, a positive linear relationship  
19 was found between AC and depression.  
20  
21  
22

23 The details of the mechanism explaining the relationship between AC and  
24 depression need to be further explored, and there may be several possible  
25 explanations. Lipids and the immune system interact with one another and have a  
26 regulatory effect on each other. Dysregulated inflammation promotes susceptibility to  
27 depression [23]. Studies have shown that inflammatory cytokines produced in the  
28 periphery enter the cells of the central nervous system and can affect  
29 neurotransmitters and neural circuits, producing the behavioral symptoms of  
30 depression [24]. When T lymphocytes are activated, they not only participate in  
31 immune inflammation but also directly contribute to the development of depression  
32 when functionally impaired [25,26] Lipid peroxidation and oxidation-specific  
33 epitopes are formed, and the levels of antioxidants such as glutathione, glutathione  
34 peroxidase, and coenzyme Q10 are reduced, resulting in or aggravating oxidative  
35 stress [27,28].  
36  
37  
38  
39  
40  
41  
42  
43  
44  
45  
46  
47

48 When lipids are abnormal, the inflammatory and oxidative and nitrosative  
49 (IO&NS) pathway is further activated [29]. At this time, the increase in binding  
50 globin and high-sensitivity C-reactive protein (CRP) is accompanied by a significant  
51 increase in interleukin-6 (IL-6), tumor necrosis factor- $\alpha$ , interferon- $\gamma$ , other  
52 pro-inflammatory cytokines, and immune inflammation [30]. These factors lead to  
53 defects in serotonin and melatonin through the kynurenine pathway, which is often  
54 considered to be one of the main causes of depression [31]. Activation of the IO&NS  
55  
56  
57  
58  
59  
60

1  
2  
3  
4 pathway leads to mitochondrial dysfunction and subsequent cellular dysfunction [32].  
5  
6 Previous studies have linked mitochondrial dysfunction in various brain regions to  
7  
8 depression [33].

9  
10 Statins have also been shown to have antidepressant effects when  
11  
12 co-prescribed with antidepressants [34]. Lowering the AC index of patients with  
13  
14 mood disorders improves CVD outcomes [35]. CVD is a heart and blood vessel  
15  
16 disease characterized by myocardial infarction, angina pectoris, heart failure, heart  
17  
18 attack and stroke [36]. Etiological studies have shown that the presence of depression  
19  
20 doubles the risk of developing CVD [37]. Factors that contribute towards the link  
21  
22 between depression and cardiac outcome may include alterations in the autonomic  
23  
24 nervous system, platelet receptors and function, coagulopathic factors,  
25  
26 proinflammatory cytokines, endothelial function, neurohormonal factors, and genetic  
27  
28 linkages [38] At the same time, patient compliance with antidepressant treatment is  
29  
30 relatively poor [39]. Atherosclerosis is a chronic vascular inflammatory disease that is  
31  
32 associated with oxidative stress and endothelial dysfunction [40]. Atherosclerosis is  
33  
34 the underlying cause of CVD and AC is a major indicator of atherosclerosis [41]. Our  
35  
36 results suggest that AC may play a role in depression. AC may be an indicator of the  
37  
38 relationship between CVD and depression, and a potential target and marker for the  
39  
40 treatment of depression or depression combined with CVD. The relevant mechanisms  
41  
42 remain to be explored further.

43  
44 Our study found increased odds of depression with increased AC in adults.  
45  
46 This suggests that controlling AC may be beneficial for depression prevention. Sex  
47  
48 may affect this relationship. In the subgroup analysis (Table 3), we found a stronger  
49  
50 relationship between AC and depression in females. The synergistic effect of estrogen  
51  
52 on cognitive and emotional functions may underlie the association between ovarian  
53  
54 hormone fluctuations and depression in females [42]. The induction of indoleamine 2,  
55  
56 3-dioxygenase and deleterious effects of tryptophan catabolizing metabolites  
57  
58 (TRYCATs) play a role in the pathophysiology of depression. Activation of IDO  
59  
60 decreases plasma tryptophan levels and increases TRYCAT synthesis in depressed  
individuals. Compared to males, females showed more IDO activation and TRYCAT



production after immune challenge [43]. This sex difference in immune dysregulation may therefore contribute to higher levels of anxiety and depression experienced by females.

**Table 3.** Subgroup analysis of the effect of the atherogenic coefficient on depression (n = 32502)

| Subgroup                                 | Number of participants | OR (95% CI)       | P for interaction |
|------------------------------------------|------------------------|-------------------|-------------------|
| Sex, n (%)                               |                        |                   | 0.036             |
| Male                                     | 15954                  | 1.01 (0.98, 1.05) |                   |
| Female                                   | 16548                  | 1.07 (1.03, 1.11) |                   |
| Age, n (%)                               |                        |                   | 0.463             |
| 20 – < 40                                | 10857                  | 1.06 (1.01, 1.10) |                   |
| 40 – < 60                                | 10632                  | 1.02 (0.98, 1.06) |                   |
| ≥ 60                                     | 11013                  | 1.06 (1.00, 1.11) |                   |
| Educational level, n (%)                 |                        |                   | 0.437             |
| < High school                            | 7841                   | 1.03 (0.99, 1.08) |                   |
| Completed high school                    | 7486                   | 1.03 (0.97, 1.08) |                   |
| > High school                            | 17152                  | 1.06 (1.02, 1.11) |                   |
| Race/ethnicity, n (%)                    |                        |                   | 0.084             |
| Non-Hispanic White                       | 14112                  | 1.06 (1.02, 1.10) |                   |
| Non-Hispanic Black                       | 6713                   | 1.00 (0.94, 1.07) |                   |
| Mexican American                         | 5174                   | 0.97 (0.91, 1.04) |                   |
| Other Hispanic                           | 3109                   | 1.10 (1.03, 1.17) |                   |
| Other race/multiple races                | 3394                   | 1.05 (0.96, 1.15) |                   |
| Marital status, n (%)                    |                        |                   | 0.873             |
| Married/living with partner              | 19532                  | 1.04 (1.01, 1.08) |                   |
| Widowed/divorced/separated/never married | 12954                  | 1.04 (1.00, 1.08) |                   |
| PIR, n (%)                               |                        |                   | 0.854             |
| < 1.00                                   | 6103                   | 1.04 (1.00, 1.09) |                   |
| 1.00 – <2.00                             | 8001                   | 1.04 (1.00, 1.09) |                   |

|  |                                    |       |                   |       |
|--|------------------------------------|-------|-------------------|-------|
|  | ≥2.00                              | 15722 | 1.03 (0.97, 1.08) |       |
|  | Smoking status, n (%)              |       |                   | 0.100 |
|  | Never smoked                       | 17828 | 1.08 (1.04, 1.13) |       |
|  | Formerly smoked                    | 7993  | 1.03 (0.98, 1.08) |       |
|  | Smoke every day/ some days         | 6664  | 1.02 (0.97, 1.06) |       |
|  | BMI, kg/m <sup>2</sup> , mean (SD) |       |                   | 0.478 |
|  | Low                                | 10729 | 1.07 (1.01, 1.14) |       |
|  | Middle                             | 10733 | 1.03 (0.98, 1.07) |       |
|  | High                               | 10743 | 1.04 (1.00, 1.08) |       |
|  | Hypertension, n (%)                |       |                   | 0.628 |
|  | Yes                                | 13940 | 1.05 (1.01, 1.09) |       |
|  | No                                 | 18562 | 1.03 (1.00, 1.08) |       |
|  | DM, n (%)                          |       |                   | 0.886 |
|  | Yes                                | 6152  | 1.04 (0.99, 1.09) |       |
|  | No                                 | 25761 | 1.04 (1.01, 1.08) |       |
|  | HbA1c, %, mean (SD)                |       |                   | 0.827 |
|  | Low                                | 8737  | 1.06 (1.00, 1.12) |       |
|  | Middle                             | 10992 | 1.05 (1.01, 1.10) |       |
|  | High                               | 12715 | 1.04 (1.00, 1.08) |       |
|  | CVD, n (%)                         |       |                   | 0.359 |
|  | Yes                                | 3571  | 1.08 (1.01, 1.14) |       |
|  | No                                 | 28927 | 1.04 (1.01, 1.08) |       |

Abbreviations: AC, atherogenic coefficient; BMI, body mass index (calculated as weight, in kilograms, divided by the square of height, in meters); CVD, cardiovascular disease; DM, diabetes mellitus; HbA1c, glycosylated hemoglobin; HTN, hypertension; PIR, poverty-income ratio (ratio of family income to poverty threshold).

This study has some limitations. First, this was a cross-sectional study; therefore, we could not determine a causal relationship between AC and depression. Second, the PHQ-9 is a proven, simple, and effective tool for identifying the severity of depressive symptoms, but it is not a diagnostic tool for MDD.

## CONCLUSIONS

Our research shows that in American adults, a higher AC is positively related to a higher prevalence of depression. Further studies are required to explore the underlying mechanisms and potential benefits of controlling AC levels in patients with depression.

**Funding:** This work was supported by the Shandong Traditional Chinese Medicine Science and Technology Development Project under Grant 2019-0178.

**Competing Interests:** This research received no specific grant from any funding agency in the public, commercial or not-for-profit sectors.

**Author Contributions:** Conceptualization, L Zhang, J Yin; methodology, L Zhang; software, J Yin; validation, H Sun, Y Liu and J Yang; formal analysis, L Zhang, J Yin, and H Sun; investigation, L Zhang; resources, L Zhang; data curation, H Sun; writing—original draft preparation, L Zhang; writing—review and editing, Y Liu and J Yang; visualization, J Yin; supervision, Y Liu and J Yang; project administration, L Zhang. All authors have read and agreed to the published version of the manuscript.

**Acknowledgments:** Thanks to the acupuncture-medicine team. Thanks to Prof. Liu and Prof. Yang for their careful teaching. Thanks for the help colleagues. Thanks to all who contributed to the manuscript.

**Data Sharing Statement:** The datasets generated and/or analyzed during the current study are available in the NHANES repository [<https://www.cdc.gov/nchs/nhanes/>].

## References

- [1] McCarron RM, Shapiro B, Rawles J, et al. Depression. *Ann Intern Med*. 2021;174:ITC65–ITC80.
- [2] Malhi GS, Mann JJ. Depression. *Lancet*. 2018;392:2299–2312.
- [3] Stringaris A. Editorial: what is depression? *J Child Psychol Psychiatry*. 2017;58:1287–1289.

- 1  
2  
3 [4] World Health Organization. Health for the world's adolescents. A second chance  
4 in the second decade. Geneva, Switzerland: World Health Organization; 2014.  
5  
6 [5] Butcher HK, McGonigal-Kenney M. Depression and dispiritedness in later life: a  
7 'gray drizzle of horror' isn't inevitable. *Am J Nurs*. 2005;105:52–61.  
8  
9 [6] Hao Y, Ge H, Sun M, et al. Selecting an appropriate animal model of depression.  
10 *Int J Mol Sci*. 2019;20:4827.  
11  
12 [7] Adams SM, Miller KE, Zylstra RG. Pharmacologic management of adult  
13 depression. *Am Fam Physician*. 2008;77:785–792.  
14  
15 [8] Chilton FH, Lee TC, Willard SL, et al. Depression and altered serum lipids in  
16 cynomolgus monkeys consuming a Western diet. *Physiol Behav*. 2011;104:222–  
17 227.  
18  
19 [9] Otte C, Gold SM, Penninx BW, et al. Major depressive disorder. *Nat Rev Dis*  
20 *Primers*. 2016;2:16065.  
21  
22 [10] Milaneschi Y, Simmons WK, van Rossum EFC, et al. Depression and obesity:  
23 evidence of shared biological mechanisms. *Mol Psychiatry*. 2019;24:18–33.  
24  
25 [11] Nieto-Vazquez I, Fernández-Veledo S, Krämer DK, et al. Insulin resistance  
26 associated to obesity: the link TNF-alpha. *Arch Physiol Biochem*. 2008;114:183–  
27 194.  
28  
29 [12] Beverly JK, Budoff MJ. Atherosclerosis: pathophysiology of insulin resistance,  
30 hyperglycemia, hyperlipidemia, and inflammation. *J Diabetes*. 2020;12:102–104.  
31  
32 [13] Singh M, Pathak MS, Paul A. A study on atherogenic indices of pregnancy  
33 induced hypertension patients as compared to normal pregnant women. *J Clin*  
34 *Diagn Res*. 2015;9:BC05–BC08.  
35  
36 [14] Nunes SO, Piccoli de Melo LG, Pizzo de Castro MR, et al. Atherogenic index of  
37 plasma and atherogenic coefficient are increased in major depression and bipolar  
38 disorder, especially when comorbid with tobacco use disorder. *J Affect Disord*.  
39 2015;172:55–62.  
40  
41 [15] Tao SH, Ren XQ, Zhang LJ, et al. Association between common cardiovascular  
42 drugs and depression. *Chin Med J (Engl)*. 2021;134:2656–2665.  
43  
44 [16] Walker AJ, Kim Y, Borissiouk I, et al. Statins: neurobiological underpinnings and  
45 mechanisms in mood disorders. *Neurosci Biobehav Rev*. 2021;128:693–708.  
46  
47 [17] Fain JA. NHANES. *Diabetes Educ*. 2017;43:151.  
48  
49  
50  
51  
52  
53  
54  
55  
56  
57  
58  
59  
60

- 1  
2  
3 [18] Lamers F, Jonkers CC, Bosma H, et al. Summed score of the Patient Health  
4 Questionnaire-9 was a reliable and valid method for depression screening in  
5 chronically ill elderly patients. *J Clin Epidemiol*. 2008;61:679–687.  
6  
7  
8 [19] Leavens A, Patten SB, Hudson M, et al. Influence of somatic symptoms on  
9 Patient Health Questionnaire-9 depression scores among patients with systemic  
10 sclerosis compared to a healthy general population sample. *Arthritis Care Res*  
11 (Hoboken). 2012;64:1195–1201.  
12  
13 [20] Brooks JM, Titus AJ, Bruce ML, et al. Depression and handgrip strength among  
14 U.S. adults aged 60 years and older from NHANES 2011-2014. *J Nutr Health*  
15 *Aging*. 2018;22:938–943.  
16  
17 [21] Levis B, Benedetti A, Thombs BD; DEPRESSion Screening Data (DEPRESSD)  
18 Collaboration. Accuracy of Patient Health Questionnaire-9 (PHQ-9) for screening  
19 to detect major depression: individual participant data meta-analysis. *BMJ*.  
20 2019;365:11476.  
21  
22 [22] Stekhoven DJ, Bühlmann P. MissForest—non-parametric missing value  
23 imputation for mixed-type data. *Bioinformatics*. 2012;28:112–118.  
24  
25 [23] Beurel E, Toups M, Nemeroff CB. The bidirectional relationship of depression  
26 and inflammation: double trouble. *Neuron*. 2020;107:234–256.  
27  
28 [24] Capuron L, Lasselin J, Castanon N. Role of adiposity-driven inflammation in  
29 depressive morbidity. *Neuropsychopharmacology*. 2017;42:115–128.  
30  
31 [25] Haapakoski R, Ebmeier KP, Alenius H, et al. Innate and adaptive immunity in the  
32 development of depression: an update on current knowledge and technological  
33 advances. *Prog Neuropsychopharmacol Biol Psychiatry*. 2016;66:63–72.  
34  
35 [26] Miller AH. Depression and immunity: a role for T cells? *Brain Behav Immun*.  
36 2010;24:1–8.  
37  
38 [27] Bartolini Gritti B, Binder CJ. Oxidation-specific epitopes are major targets of  
39 innate immunity in atherosclerosis. *Hamostaseologie*. 2016;36:89–96.  
40  
41 [28] Maes M, Mihaylova I, Kubera M, et al. Increased plasma peroxides and serum  
42 oxidized low density lipoprotein antibodies in major depression: markers that  
43 further explain the higher incidence of neurodegeneration and coronary artery  
44 disease. *J Affect Disord*. 2010;125:287–94.  
45  
46 [29] Morris G, Puri BK, Walker AJ, et al. Shared pathways for neuroprogression and  
47 somatoprogession in neuropsychiatric disorders. *Neurosci Biobehav Rev*.  
48 2019;107:862–882.  
49  
50  
51  
52  
53  
54  
55  
56  
57  
58  
59  
60

- 1  
2  
3 [30]Maes M, Ruckoanich P, Chang YS, et al. Multiple aberrations in shared  
4 inflammatory and oxidative & nitrosative stress (IO&NS) pathways explain the  
5 co-association of depression and cardiovascular disorder (CVD), and the  
6 increased risk for CVD and due mortality in depressed patients. *Prog*  
7 *Neuropsychopharmacol Biol Psychiatry*. 2011;35:769–783.  
8  
9  
10  
11 [31]Gałecki P, Talarowska M. Inflammatory theory of depression. *Psychiatr Pol*.  
12 2018;52:437–447.  
13  
14 [32]Mezzaroba L, Alfieri DF, Colado Simão AN, et al. The role of zinc, copper,  
15 manganese and iron in neurodegenerative diseases. *Neurotoxicology*.  
16 2019;74:230–241.  
17  
18 [33]Bansal Y, Kuhad A. Mitochondrial dysfunction in depression. *Curr*  
19 *Neuropharmacol*. 2016;4:610–618.  
20  
21 [34]Singh D, Lippmann S. Can statins diminish depression? *Prim Care Companion*  
22 *CNS Disord*. 2018;20:17br02169.  
23  
24 [35]Zhang Y, Chen Y, Ma L. Depression and cardiovascular disease in elderly:  
25 current understanding. *J Clin Neurosci*. 2018;47:1–5.  
26  
27 [36]Xu C, Liang J, Xu S, et al. Increased serum levels of aldehydes are associated  
28 with cardiovascular disease and cardiovascular risk factors in adults. *J Hazard*  
29 *Mater*. 2020;400:123134.  
30  
31 [37]Nicholson A, Kuper H, Hemingway H. Depression as an aetiologic and  
32 prognostic factor in coronary heart disease: a meta-analysis of 6362 events  
33 among 146 538 participants in 54 observational studies. *Eur Heart J*.  
34 2006;27:2763–2774.  
35  
36 [38]de Jonge P, Rosmalen JG, Kema IP, et al. Psychophysiological biomarkers  
37 explaining the association between depression and prognosis in coronary artery  
38 patients: a critical review of the literature. *Neurosci Biobehav Rev*. 2010;35:84–  
39 90.  
40  
41 [39]Pampallona S, Bollini P, Tibaldi G, et al. Patient adherence in the treatment of  
42 depression. *Br J Psychiatry*. 2002;180:104–109.  
43  
44 [40]Marchio P, Guerra-Ojeda S, Vila JM, et al. Targeting early atherosclerosis: a  
45 focus on oxidative stress and inflammation. *Oxid Med Cell Longev*.  
46 2019;2019:8563845.  
47  
48 [41]Nitsa A, Toutouza M, Machairas N, et al. Vitamin D in cardiovascular disease. In  
49 *Vivo*. 2018;32:977–981.  
50  
51  
52  
53  
54  
55  
56  
57  
58  
59  
60

1  
2  
3 [42]Albert KM, Newhouse PA. Estrogen, stress, and depression: cognitive and  
4 biological interactions. *Annu Rev Clin Psychol*. 2019;15:399–423.

5  
6 [43]Maes M, Leonard BE, Myint AM, et al. The new '5-HT' hypothesis of depression:  
7 cell-mediated immune activation induces indoleamine 2,3-dioxygenase, which  
8 leads to lower plasma tryptophan and an increased synthesis of detrimental  
9 tryptophan catabolites (TRYCATs), both of which contribute to the onset of  
10 depression. *Prog Neuropsychopharmacol Biol Psychiatry*. 2011;35:702–721.  
11  
12  
13  
14  
15  
16  
17  
18

## 19 **FIGURE LEGENDS**

20  
21 **Figure 1.** Flowchart for inclusion of study participants.

22  
23 **Figure 2.** Association between AC and depression in US adults (n=4759). The black  
24 vertical line on the horizontal axis represents the caffeine distribution, the red line  
25 represents the best fit, and the difference between the dashed lines represents the 95%  
26 confidence interval. The data was adjusted for age, sex, race/ethnicity, body mass  
27 index, poverty-income ratio, educational level, marital status, hypertension, diabetes  
28 mellitus, alcohol intake, smoking status, physical activity, and glycosylated  
29 hemoglobin.  
30  
31  
32  
33  
34  
35  
36  
37  
38  
39  
40  
41  
42  
43  
44  
45  
46  
47  
48  
49  
50  
51  
52  
53  
54  
55  
56  
57  
58  
59  
60

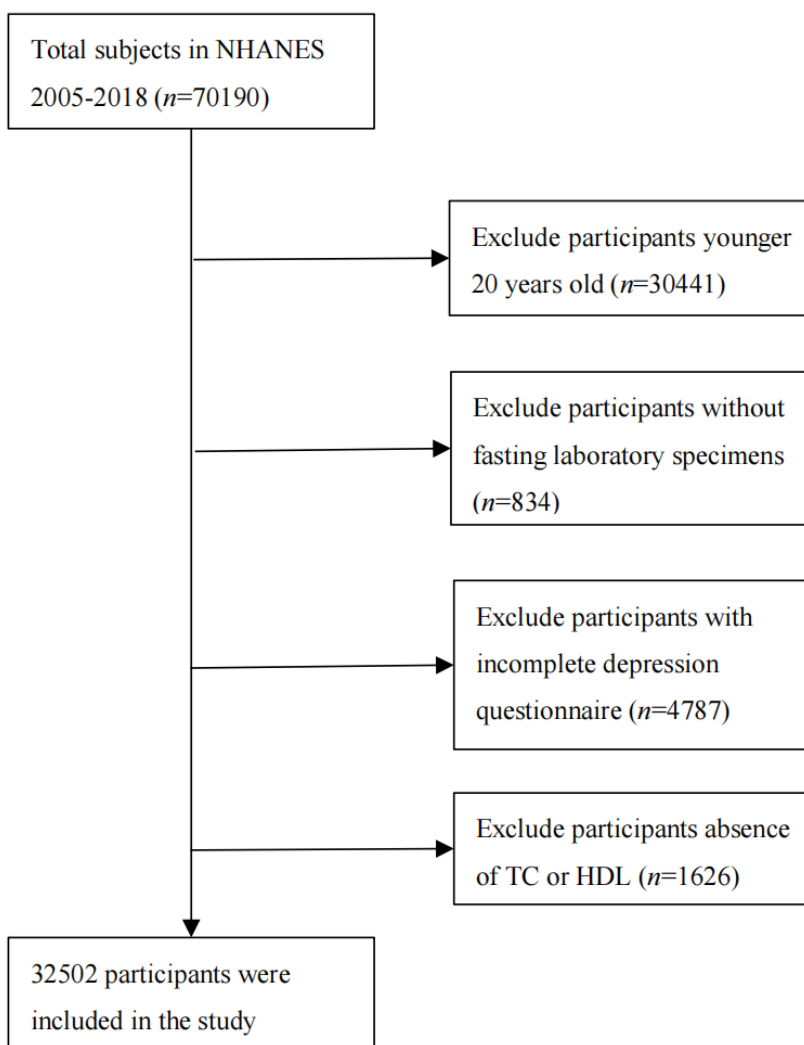

Figure 1. Flowchart for inclusion of study participants.

Flowchart for inclusion of study participants.

114x140mm (200 x 200 DPI)



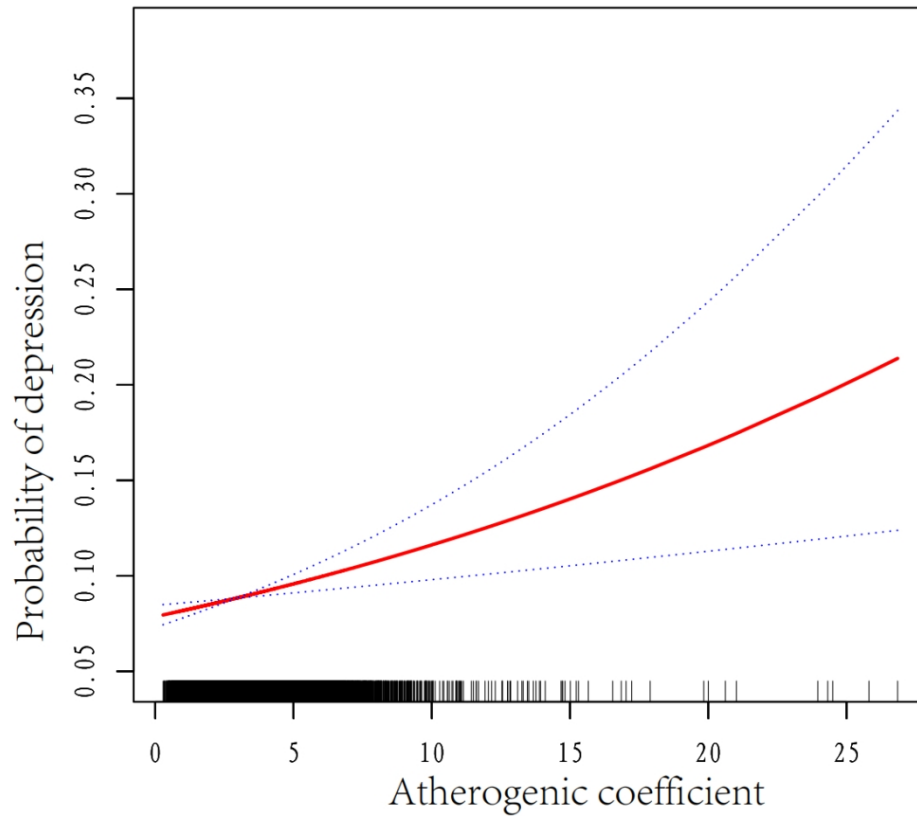

Association between AC and depression in US adults (n=4759). The black vertical line on the horizontal axis represents the caffeine distribution, the red line represents the best fit, and the difference between the dashed lines represents the 95% confidence interval. The data was adjusted for age, sex, race/ethnicity, body mass index, poverty-income ratio, educational level, marital status, hypertension, diabetes mellitus, alcohol intake, smoking status, physical activity, and glycosylated hemoglobin.

152x152mm (200 x 200 DPI)

Table S1. Missing covariates of study participants ( $n = 32502$ ).

| Variable                | Number of patients (% missing) |
|-------------------------|--------------------------------|
| Age                     | 0 (0%)                         |
| Sex                     | 0 (0%)                         |
| Race/ethnicity          | 0 (0%)                         |
| Educational level       | 23 (0.07%)                     |
| Marital status          | 16 (0.04%)                     |
| Poverty-income ratio    | 2767 (8.51%)                   |
| Body mass index         | 297 (0.91%)                    |
| Alcohol intake          | 4661 (14.34%)                  |
| Smoking status          | 17 (0.05%)                     |
| Physical activity       | 4102 (12.62%)                  |
| Hypertension            | 0 (0%)                         |
| Diabetes mellitus       | 589 (1.81%)                    |
| Glycosylated hemoglobin | 58 (0.18%)                     |

**STROBE 2007 (v4) Statement—Checklist of items that should be included in reports of *cross-sectional studies***

| Section/Topic                | Item # | Recommendation                                                                                                                                                                       | Reported on page # |
|------------------------------|--------|--------------------------------------------------------------------------------------------------------------------------------------------------------------------------------------|--------------------|
| <b>Title and abstract</b>    | 1      | (a) Indicate the study’s design with a commonly used term in the title or the abstract                                                                                               | 2                  |
|                              |        | (b) Provide in the abstract an informative and balanced summary of what was done and what was found                                                                                  | 2                  |
| <b>Introduction</b>          |        |                                                                                                                                                                                      |                    |
| Background/rationale         | 2      | Explain the scientific background and rationale for the investigation being reported                                                                                                 | 3                  |
| Objectives                   | 3      | State specific objectives, including any prespecified hypotheses                                                                                                                     | 4                  |
| <b>Methods</b>               |        |                                                                                                                                                                                      |                    |
| Study design                 | 4      | Present key elements of study design early in the paper                                                                                                                              |                    |
| Setting                      | 5      | Describe the setting, locations, and relevant dates, including periods of recruitment, exposure, follow-up, and data collection                                                      |                    |
| Participants                 | 6      | (a) Give the eligibility criteria, and the sources and methods of selection of participants                                                                                          | 4                  |
| Variables                    | 7      | Clearly define all outcomes, exposures, predictors, potential confounders, and effect modifiers. Give diagnostic criteria, if applicable                                             | 5-6                |
| Data sources/<br>measurement | 8*     | For each variable of interest, give sources of data and details of methods of assessment (measurement). Describe comparability of assessment methods if there is more than one group | 6-7                |
| Bias                         | 9      | Describe any efforts to address potential sources of bias                                                                                                                            | 7                  |
| Study size                   | 10     | Explain how the study size was arrived at                                                                                                                                            | 4                  |
| Quantitative variables       | 11     | Explain how quantitative variables were handled in the analyses. If applicable, describe which groupings were chosen and why                                                         | 5-6                |
| Statistical methods          | 12     | (a) Describe all statistical methods, including those used to control for confounding                                                                                                | 6-7                |
|                              |        | (b) Describe any methods used to examine subgroups and interactions                                                                                                                  | 5                  |
|                              |        | (c) Explain how missing data were addressed                                                                                                                                          | 7                  |
|                              |        | (d) If applicable, describe analytical methods taking account of sampling strategy                                                                                                   |                    |
|                              |        | (e) Describe any sensitivity analyses                                                                                                                                                |                    |
| <b>Results</b>               |        |                                                                                                                                                                                      |                    |

|                          |     |                                                                                                                                                                                                                                                                                                                                                                                                               |               |
|--------------------------|-----|---------------------------------------------------------------------------------------------------------------------------------------------------------------------------------------------------------------------------------------------------------------------------------------------------------------------------------------------------------------------------------------------------------------|---------------|
| Participants             | 13* | (a) Report numbers of individuals at each stage of study—eg numbers potentially eligible, examined for eligibility, confirmed eligible, included in the study, completing follow-up, and analysed<br>(b) Give reasons for non-participation at each stage<br>(c) Consider use of a flow diagram                                                                                                               | 7-10<br><br>7 |
| Descriptive data         | 14* | (a) Give characteristics of study participants (eg demographic, clinical, social) and information on exposures and potential confounders<br>(b) Indicate number of participants with missing data for each variable of interest                                                                                                                                                                               | 7<br>7        |
| Outcome data             | 15* | Report numbers of outcome events or summary measures                                                                                                                                                                                                                                                                                                                                                          | 7             |
| Main results             | 16  | (a) Give unadjusted estimates and, if applicable, confounder-adjusted estimates and their precision (eg, 95% confidence interval). Make clear which confounders were adjusted for and why they were included<br>(b) Report category boundaries when continuous variables were categorized<br>(c) If relevant, consider translating estimates of relative risk into absolute risk for a meaningful time period | 10<br><br>    |
| Other analyses           | 17  | Report other analyses done—eg analyses of subgroups and interactions, and sensitivity analyses                                                                                                                                                                                                                                                                                                                | 14            |
| <b>Discussion</b>        |     |                                                                                                                                                                                                                                                                                                                                                                                                               |               |
| Key results              | 18  | Summarise key results with reference to study objectives                                                                                                                                                                                                                                                                                                                                                      | 12            |
| Limitations              | 19  | Discuss limitations of the study, taking into account sources of potential bias or imprecision. Discuss both direction and magnitude of any potential bias                                                                                                                                                                                                                                                    | 15            |
| Interpretation           | 20  | Give a cautious overall interpretation of results considering objectives, limitations, multiplicity of analyses, results from similar studies, and other relevant evidence                                                                                                                                                                                                                                    |               |
| Generalisability         | 21  | Discuss the generalisability (external validity) of the study results                                                                                                                                                                                                                                                                                                                                         | 12-14         |
| <b>Other information</b> |     |                                                                                                                                                                                                                                                                                                                                                                                                               |               |
| Funding                  | 22  | Give the source of funding and the role of the funders for the present study and, if applicable, for the original study on which the present article is based                                                                                                                                                                                                                                                 | 16            |

\*Give information separately for cases and controls in case-control studies and, if applicable, for exposed and unexposed groups in cohort and cross-sectional studies.

**Note:** An Explanation and Elaboration article discusses each checklist item and gives methodological background and published examples of transparent reporting. The STROBE checklist is best used in conjunction with this article (freely available on the Web sites of PLoS Medicine at <http://www.plosmedicine.org/>, Annals of Internal Medicine at <http://www.annals.org/>, and Epidemiology at <http://www.epidem.com/>). Information on the STROBE Initiative is available at [www.strobe-statement.org](http://www.strobe-statement.org).

# BMJ Open

## Association between atherogenic coefficient and depression in US adults: a cross-sectional study with data from National Health and Nutrition Examination Survey 2005-2018

|                                 |                                                                                                                                                                                                                                                                                                                                                                |
|---------------------------------|----------------------------------------------------------------------------------------------------------------------------------------------------------------------------------------------------------------------------------------------------------------------------------------------------------------------------------------------------------------|
| Journal:                        | <i>BMJ Open</i>                                                                                                                                                                                                                                                                                                                                                |
| Manuscript ID                   | bmjopen-2023-074001.R1                                                                                                                                                                                                                                                                                                                                         |
| Article Type:                   | Original research                                                                                                                                                                                                                                                                                                                                              |
| Date Submitted by the Author:   | 06-Sep-2023                                                                                                                                                                                                                                                                                                                                                    |
| Complete List of Authors:       | Zhang, Lu; Shandong University of Traditional Chinese Medicine<br>Yin, Jiahui; Shandong University of Traditional Chinese Medicine<br>Sun, Haiyang; Guangzhou University of Chinese Medicine<br>Yang, Jiguo; Shandong University of Traditional Chinese Medicine<br>Liu, Yuanxiang; Affiliated Hospital of Shandong University of Traditional Chinese Medicine |
| <b>Primary Subject Heading</b>: | Mental health                                                                                                                                                                                                                                                                                                                                                  |
| Secondary Subject Heading:      | Health services research                                                                                                                                                                                                                                                                                                                                       |
| Keywords:                       | Risk Factors, Adult psychiatry < PSYCHIATRY, Depression & mood disorders < PSYCHIATRY, Lipid disorders < DIABETES & ENDOCRINOLOGY                                                                                                                                                                                                                              |
|                                 |                                                                                                                                                                                                                                                                                                                                                                |

SCHOLARONE™  
Manuscripts



I, the Submitting Author has the right to grant and does grant on behalf of all authors of the Work (as defined in the below author licence), an exclusive licence and/or a non-exclusive licence for contributions from authors who are: i) UK Crown employees; ii) where BMJ has agreed a CC-BY licence shall apply, and/or iii) in accordance with the terms applicable for US Federal Government officers or employees acting as part of their official duties; on a worldwide, perpetual, irrevocable, royalty-free basis to BMJ Publishing Group Ltd ("BMJ") its licensees and where the relevant Journal is co-owned by BMJ to the co-owners of the Journal, to publish the Work in this journal and any other BMJ products and to exploit all rights, as set out in our [licence](#).

The Submitting Author accepts and understands that any supply made under these terms is made by BMJ to the Submitting Author unless you are acting as an employee on behalf of your employer or a postgraduate student of an affiliated institution which is paying any applicable article publishing charge ("APC") for Open Access articles. Where the Submitting Author wishes to make the Work available on an Open Access basis (and intends to pay the relevant APC), the terms of reuse of such Open Access shall be governed by a Creative Commons licence – details of these licences and which [Creative Commons](#) licence will apply to this Work are set out in our licence referred to above.

Other than as permitted in any relevant BMJ Author's Self Archiving Policies, I confirm this Work has not been accepted for publication elsewhere, is not being considered for publication elsewhere and does not duplicate material already published. I confirm all authors consent to publication of this Work and authorise the granting of this licence.

1  
2  
3  
4 **Association between atherogenic coefficient and depression in US**  
5  
6 **adults: a cross-sectional study with data from National Health and**  
7  
8 **Nutrition Examination Survey 2005-2018**  
9  
10

11 **Lu Zhang<sup>a</sup>, Jiahui Yin<sup>b</sup>, Haiyang Sun<sup>c</sup>, Jiguo Yang<sup>d\*</sup>, Yuanxiang Liu<sup>e\*</sup>**

12 *<sup>a</sup>Shandong University of Traditional Chinese Medicine, Jinan, China.*

13 *<sup>b</sup>Shandong University of Traditional Chinese Medicine, Jinan, China.*

14 *<sup>c</sup>Guangzhou University of Chinese Medicine, Guangzhou, China.*

15 *<sup>d</sup>Shandong University of Traditional Chinese Medicine, Jinan, China.*

16 *<sup>e</sup>Affiliated Hospital of Shandong University of Traditional Chinese Medicine, Jinan,*  
17 *China.*

18 \* Correspondence: Yuanxiang Liu: lyxlwtg001@163.com;

19 Address: No.16369 Jingshi Road, Lixia District, Jinan, China  
20  
21  
22  
23  
24  
25  
26  
27  
28  
29  
30  
31  
32  
33  
34  
35  
36  
37  
38  
39  
40  
41  
42  
43  
44  
45  
46  
47  
48  
49  
50  
51  
52  
53  
54  
55  
56  
57  
58  
59  
60

## ABSTRACT

**Objective:** The pathogenesis of depression is related to immune inflammatory response. AC is an important indicator of lipid abnormalities, which can lead to immune inflammatory responses. However, no study has investigated the relationship between AC and depression in adult Americans. Therefore, we investigated this relationship.

**Design:** This study used a cross-sectional design.

**Setting:** The National Health and Nutrition Examination Survey (2005-2018) data were used for this study.

**Participants:** A total of 32502 participants aged 20 years or older who had complete information for AC and depression were included in this study.

**Primary and secondary outcome measures:** Depressive symptoms were assessed using the nine-item version of the Patient Health Questionnaire (PHQ-9), with a cutoff point of 9/10 indicating likely depression cases. Weighted logistic regression analyses and the smooth curve fittings were performed to explore the association between AC and depression.

**Results:** After adjusting for potential confounders, a single unit increase in AC was associated with a 3% increase in the prevalence of depression (hazard ratio =1.03, 95% confidence interval =1.00-1.06,  $P = 0.039$ ). The relationship between AC and depression was more obvious in females.

**Conclusions:** The AC is positively associated with depression.

### Strengths and Limitations:

- The quality and scale of the National Health and Nutrition Examination Survey database ensured our results' statistical power and reliability.
- A wide range of sociodemographic, lifestyle, and physical health covariates were adjusted to reduce residual confounding.
- Its cross-sectional design limited this study, and no causal relationships could be determined.
- The PHQ-9 is a proven, simple, and effective tool for identifying the severity of depressive symptoms, but it is not a diagnostic tool for major depressive disorder (MDD).



## INTRODUCTION

Depression is a clinically common emotional state characterized by persistent sadness or inability to experience pleasure, accompanied by deficits in daily functioning [1].

In 2008, the World Health Organization (WHO) ranked major depression as the third leading cause of the global disease burden and projected that it would be the number one cause by 2030 [2]. More than 300 million people worldwide suffer from major depressive disorder (MDD) [3], affecting about 8% of adults in the US [4].

Depression can cause various adverse events, seriously endangering lives and global health [5,6]. Current antidepressant treatments are effective, but there are many side effects; for example, antidepressants may increase suicidal thoughts in some people [7]. Evidence supports screening for depression and providing early intervention [8]. Therefore, it is necessary to explore the factors related to depression.

Abnormal lipid metabolism leads to many pathological changes. Firstly, activation of the pro-inflammatory response leads to a decrease in high-density lipoprotein (HDL) and phospholipids and a compensatory increase in phospholipid-rich low-density lipoprotein (LDL), which in turn slows total cholesterol (TC) metabolism and affects neurotransmitters and neural circuits [9]. However, cytokine signaling in adipose tissue, particularly tumor necrosis factor (TNF), promotes metabolic dysregulation [10]. In addition, some studies have shown that changes in circulating lipid concentrations may be associated with depression [11]. Abnormal lipids are involved in the formation of atherosclerosis. The pathogenesis of atherosclerosis is based on the lipid theory, and the explanation is related to excess cholesterol being the sole cause of lipid deposition in the arterial wall [12]. Atherosclerosis can cause cardiovascular disease (CVD), stroke, etc., often co-morbidities with depression.

The atherogenic coefficient (AC) is an important index for assessing the degree of atherosclerosis, calculated as  $(TC - HDL)/HDL$  [13]. Nunes et al. found that AC was elevated in patients with MDD and bipolar disorder [14]. AC and depression can be controlled using statins and other cardiovascular drugs [15,16].

1  
2  
3  
4 Exploring the role of AC in depression may be beneficial for treating  
5 depression and its complications. Therefore, we used data from the National Health  
6 and Nutrition Examination Survey (NHANES) database to explore the association of  
7 AC with depression in adults.  
8  
9  
10

## 11 12 13 14 **METHODS**

### 15 16 **Study design and participants**

17 Data of the participants in this study were obtained from the NHANES database, a  
18 major program conducted by the Centers for Disease Control and Prevention (CDC)  
19 to assess the health and nutritional status of 5,000 adults and children in the US  
20 annually [17]. The NHANES database contains demographic, dietary, examination,  
21 laboratory, and questionnaire data. The National Center for Health Statistics (NCHS)  
22 Research Ethics Review Board (ERB) authorized the NHANES study protocols.  
23 Further information regarding the NHANES data can be obtained from its official  
24 website (<http://www.cdc.gov/nchs/nhanes.htm>).  
25  
26  
27  
28  
29  
30  
31  
32

33 Participants in our study were screened according to the following inclusion  
34 criteria: 1) aged 20 years or above and 2) participation in laboratory tests on an empty  
35 stomach. The exclusion criteria were: 1) incomplete Patient Health Questionnaire-9  
36 (PHQ-9) and 2) no data on total cholesterol or high-density lipoprotein levels.  
37  
38  
39  
40

### 41 **Assessment of depression**

42 The PHQ-9 is used to assess depression. The PHQ-9 contains nine items that capture  
43 the frequency of depressive symptoms: appetite problems, fatigue, sleep difficulties,  
44 psychomotor retardation or agitation, concentration problems, lack of interest,  
45 depressed mood, feelings of worthlessness, and suicidal ideation. It is now widely  
46 accepted as an accurate and reliable method for screening depression [18,19]. Each  
47 question is scored from '0' (not at all) to '3' (nearly every day), with a total score of  
48 0–27, where a score  $\geq 10$  is considered clinically relevant depression (CRD) [20].  
49 PHQ-9 sensitivity compared with semi-structured diagnostic interviews was greater  
50 than previous conventional meta-analyses that combined reference standards. A 10- or  
51  
52  
53  
54  
55  
56  
57  
58  
59  
60

1  
2  
3  
4 above cutoff score maximized the overall sensitivity and specificity for subgroups  
5  
6 [21].

### 7 **Assessment of AC**

8  
9 Fasting blood was drawn from individuals aged  $\geq 20$  years, and the blood samples  
10  
11 were processed, stored, and shipped to the Johns Hopkins University Lipoprotein  
12  
13 Assay Laboratory at the Ambulator-Testing Center laboratory. HDL levels were  
14  
15 measured directly in the serum. The apolipoprotein B (apo B)-containing lipoproteins  
16  
17 in the specimen were reacted with a blocking reagent that rendered them non-reactive  
18  
19 with the enzymatic cholesterol reagent under the assay conditions. Reagents were  
20  
21 purchased from Roche/Boehringer-Mannheim Diagnostics (Mannheim, Germany).  
22  
23 The method uses sulfated alpha-cyclodextrin in the presence of  $Mg^{+2}$ , which forms  
24  
25 complexes with apoB-containing lipoproteins and polyethylene glycol-coupled  
26  
27 cholesteryl esterase and cholesterol oxidase for HDL cholesterol measurement. HDL  
28  
29 cholesterol data collected from participants in 2005-2006 were adjusted using the  
30  
31 following equation: corrected HDL = (Solomon Park assigned HDL value)  $\times$   
32  
33 (participant HDL). Total cholesterol was measured enzymatically in the serum or  
34  
35 plasma in a series of coupled reactions that hydrolyze cholesteryl esters and oxidize  
36  
37 the 3-OH cholesterol group. All the information can be obtained from  
38  
39 <https://wwwn.cdc.gov/Nchs/Nhanes/>.

### 40 **Assessment of covariates**

41  
42 Covariates in this study, including body mass index (BMI), alcohol intake, physical  
43  
44 activity, and glycosylated hemoglobin, were used as continuous variables. BMI was  
45  
46 measured as weight (kg) divided by height (m) squared with  $<25.0$  kg/m<sup>2</sup> indicating  
47  
48 normal, 25.0 to  $<30.0$  kg/m<sup>2</sup> indicating overweight,  $\geq 30.0$  kg/m<sup>2</sup> indicating obesity.  
49  
50 Alcohol intake was determined by extracting the mean alcohol intake from the first  
51  
52 and second dietary surveys, considering a single day's intake for participants who  
53  
54 consumed alcohol at least once. Physical activity was self-reported by participants as  
55  
56 either inactive, moderate, or vigorous. The study considered CVD to include coronary  
57  
58 heart disease, congestive heart failure, heart attack, stroke, and angina. Categorical  
59  
60 variables included age (20–40 years, 40–60 years,  $\geq 60$  years), sex (male or female),

1  
2  
3  
4 and race/ethnicity (non-Hispanic white, non-Hispanic black, Mexican American,  
5 other Hispanic, or other race/multiple races). The poverty-income ratio (PIR) was  
6 defined as the ratio of family income to poverty threshold (<1 indicating an income  
7 below the poverty threshold and  $\geq 1$  indicating an income above the poverty threshold.  
8  
9 The latter category was further classified into two groups: 1.00 to <2.00 and  $\geq 2.00$ ).  
10  
11 Education level was categorized as high school not completed, high school  
12 completed, or high school graduate and some college or associated degrees pursued.  
13  
14 Marital status was defined as married/living with a partner or  
15 widowed/divorced/separated/never married. Hypertension (HTN) (defined as systolic  
16 blood pressure  $\geq 140$  mmHg or diastolic blood pressure  $\geq 90$  mmHg) was determined  
17 using three blood pressure measurements at different times, an existing diagnosis, or  
18 evidence of an existing antihypertensive medication regimen. Diabetes mellitus (DM)  
19 was defined as either taking glucose-lowering therapies, a glycosylated hemoglobin  
20 (HbA1c) concentration of  $\geq 6.5\%$ , use of anti-diabetic medication, oral glucose  
21 tolerance test (OGTT)  $\geq 11.1$  mmol/L, fasting plasma glucose  $\geq 7.0$  mmol/L, or  
22 random blood glucose  $\geq 11.1$  mmol/L. Smoking status was categorized as  
23 non-smokers (smoked <100 cigarettes in a lifetime), former smoker (not currently  
24 smoking but have consumed  $\geq 100$  cigarettes previously), and current smoker  
25 (smoking at least  $\geq 100$  cigarettes every day or some days). The use of antidepressants,  
26 anxiolytics, sedatives, and hypnotics was were divided into use or non-use through  
27 questionnaires.  
28  
29  
30  
31  
32  
33  
34  
35  
36  
37  
38  
39  
40  
41  
42  
43

#### 44 **Statistical analysis**

45  
46 The main concern was whether AC is associated with depression after adjusting for  
47 other factors that may influence depression. Continuous variables are expressed as  
48 mean  $\pm$  standard deviation, and categorical variables are expressed as percentages.  
49  
50 The weighted  $\chi^2$  test was used to compare categorical variables between groups, a  
51 one-way analysis of variance was used to compare normally distributed variables  
52 between groups, and the Kruskal-Wallis H test was used to compare variables with a  
53 skewed distribution between groups. Weighted multivariate logistic regression  
54 analysis evaluated the independent association between AC and depression. The  
55  
56  
57  
58  
59  
60

1  
2  
3  
4 participants were categorized into four groups based on AC:  $< 1.9310$ ,  $1.9310$  to  $<$   
5  $2.6695$ ,  $2.6695$  to  $< 3.6430$ , and  $\geq 3.6430$ . We used three levels of adjustment: Model  
6 1 was adjusted for age, sex, and race/ethnicity; Model 2 was adjusted for the variables  
7 in Model 1 plus BMI, PIR, educational level, and marital status; and Model 3 was  
8 adjusted for the variables in Model 2 plus HTN, DM, alcohol intake, smoking status,  
9 physical activity, and glycosylated hemoglobin. The imputation of missing data was  
10 conducted using the missForest R package. This random forest-based technique is  
11 highly computationally efficient for high-dimensional data of categorical and  
12 continuous predictors [22]. The missing values are presented in the table (Table S1).

13  
14  
15  
16  
17  
18  
19  
20  
21 All analyses were performed using R software (The R Foundation, Vienna,  
22 Austria) and Empower (X&Y Solutions, Boston, MA, USA). Statistical significance  
23 was defined as a two-sided  $P$ -value  $< 0.05$ .

#### 24 25 26 27 **Patient and public involvement**

28  
29  
30 None.

## 31 32 33 34 **RESULTS**

### 35 36 37 **Participant characteristics**

38  
39 In this study, 32,502 participants were included (Figure 1). Table 1 shows the  
40 characteristics of the participants according to their AC. There were statistically  
41 significant differences in age, sex, educational level, race/ethnicity, marital status,  
42 PIR, alcohol intake, smoking status, physical activity, BMI, HTN, DM, HbA1c,  
43 cholesterol, and HDL between the different AC groups ( $P < 0.05$ ). In addition, there  
44 were no significant differences in the use of antidepressants, anxiolytics, sedatives,  
45 and hypnotics in participants with CVD ( $p > 0.05$ ). Covariates with  $P < 0.05$  in  
46 univariate analysis were included for further analysis.

47  
48  
49  
50  
51  
52  
53  
54  
55  
56  
57  
58  
59  
60  
61 Participants in the lowest AC in Q1 ( $< 1.9310$ ) were likely to be female,  
younger, more educated, married or cohabitating, non-Hispanic White, wealthier, less  
physically active, smoked less, consumed more alcohol, had no DM or HTN, higher  
HDL levels, lower BMI, lower HbA1c levels, and TC levels.

In contrast, participants with the highest AC in Q4 (>3.6430) were likely to be male, middle-aged, more highly educated, non-Hispanic White, married or cohabitating, wealthier, consumed less alcohol, never smoked, inactive and obese, had HTN, lower HDL levels, higher BMI, higher HbA1c and TC levels.

**Table 1.** Characteristics of the study population, using National Health and Nutrition Examination Survey data from 2005–2018 (N = 32,502), Weighted

| Characteristic                           | Overall              | Atherogenic coefficient quartiles† |                               |                               |                         | p-value |
|------------------------------------------|----------------------|------------------------------------|-------------------------------|-------------------------------|-------------------------|---------|
|                                          |                      | Q1<br>( $< 1.9310$ )               | Q2<br>(1.9310 to $< 2.6695$ ) | Q3<br>(2.6695 to $< 3.6430$ ) | Q4<br>( $\geq 3.6430$ ) |         |
| Sex (%)                                  |                      |                                    |                               |                               |                         | <0.001  |
| Male                                     | 48.78 (48.21,49.35)  | 32.75 (31.33, 34.21)               | 42.40 (40.95, 43.87)          | 54.04 (52.56,55.52)           | 66.36 (65.00,67.70)     |         |
| Female                                   | 51.22 (50.65, 51.79) | 67.25 (65.79, 68.67)               | 57.60 (56.13, 59.05)          | 45.96 (44.48, 47.44)          | 33.64 (32.30, 35.00)    |         |
| Age (%)                                  |                      |                                    |                               |                               |                         | <0.001  |
| 20 to < 40                               | 35.93 (34.76, 37.12) | 40.78 (38.93, 42.66)               | 36.40 (34.73, 38.10)          | 33.15 (31.58, 34.76)          | 33.30 (31.69, 34.95)    |         |
| 40 to <60                                | 37.75 (36.83, 38.67) | 29.54 (27.96, 31.18)               | 35.21 (33.59, 36.87)          | 40.86 (39.37,42.37)           | 45.58 (43.89, 47.29)    |         |
| $\geq 60$                                | 26.32 (25.26,27.40)  | 29.67 (28.04, 31.36)               | 28.39 (26.74, 30.09)          | 25.99 (24.53, 27.50)          | 21.12 (19.78,22.52)     |         |
| Educational level (%)                    |                      |                                    |                               |                               |                         | <0.001  |
| <High school                             | 15.44 (14.36, 16.58) | 12.40 (11.24, 13.65)               | 14.04 (12.70, 15.49)          | 16.18 (14.78, 17.67)          | 19.24 (17.90, 20.65)    |         |
| Completed high school                    | 23.30 (22.35, 24.27) | 20.49 (19.12, 21.93)               | 22.16 (20.82, 23.56)          | 24.87 (23.59,26.20)           | 25.75 (24.17, 27.40)    |         |
| >High school                             | 61.26 (59.57, 62.92) | 67.11 (65.08, 69.08)               | 63.80 (61.69, 65.86)          | 58.95 (56.99, 60.89)          | 55.02 (52.92, 57.09)    |         |
| Race/ethnicity (%)                       |                      |                                    |                               |                               |                         | <0.001  |
| Non-Hispanic White                       | 68.41 (65.86, 70.86) | 69.02 (66.42, 71.51)               | 68.41 (65.87, 70.84)          | 68.23 (65.19, 71.72)          | 67.98 (65.01, 70.81)    |         |
| Non-Hispanic Black                       | 10.50 (9.27,11.88)   | 13.76 (12.07, 15.64)               | 11.32 (9.98, 12.81)           | 9.65 (8.42, 11.03)            | 7.20 (6.22, 8.32)       |         |
| Mexican American                         | 8.46 (7.22, 9.89)    | 6.06 (5.10, 7.18)                  | 7.53 (6.34, 8.93)             | 9.50 (8.04, 11.20)            | 10.82 (9.06, 12.86)     |         |
| Other Hispanic                           | 5.44 (4.65,6.35)     | 4.27 (3.54, 5.13)                  | 5.22 (4.40, 6.18)             | 5.83 (4.87, 6.97)             | 6.47 (5.42, 7.70)       |         |
| Other races/multiple races               | 7.18 (6.50, 7.93)    | 6.89 (6.08, 7.81)                  | 7.52 (6.63, 8.51)             | 6.79 (5.96, 7.73)             | 7.54 (6.67, 8.50)       |         |
| Marital status (%)                       |                      |                                    |                               |                               |                         | <0.001  |
| Married/Living with a partner            | 64.04 (62.84, 65.22) | 59.25 (57.29, 61.17)               | 62.92 (61.31, 64.54)          | 66.06 (64.48, 67.61)          | 68.04 (66.58,69.46)     |         |
| Widowed/Divorced/Separated/Never married | 35.96 (34.78, 37.16) | 40.75 (38.83, 42.71)               | 37.08 (35.49, 38.69)          | 33.94 (32.39, 35.52)          | 31.96 (30.54, 33.42)    |         |
| PIR (%)                                  |                      |                                    |                               |                               |                         | <0.001  |
| < 1.00                                   | 13.58 (12.64, 14.57) | 12.69 (11.51, 13.97)               | 13.36 (12.18, 14.64)          | 12.77 (11.70, 13.92)          | 15.51 (14.13, 17.00)    |         |
| 1.00 to <2.00                            | 20.31 (19.33, 21.32) | 18.88 (17.52, 20.31)               | 19.48 (18.36, 20.65)          | 21.07 (19.63, 22.60)          | 21.83 (20.18, 23.57)    |         |
| $\geq 2.00$                              | 66.12 (64.45, 67.74) | 68.44 (66.44, 70.37)               | 67.16 (65.18, 69.08)          | 66.15 (64.30, 67.96)          | 62.66 (60.14, 65.12)    |         |
| Alcohol intake (g/day)                   | 9.38 (8.90,9.87)     | 12.33 (11.43, 13.24)               | 8.91 (8.22, 9.61)             | 7.84 (7.19, 8.49)             | 8.43 (7.62, 9.25)       | <0.001  |

|                                           |                       |                      |                      |                      |                      |  |  |  |        |
|-------------------------------------------|-----------------------|----------------------|----------------------|----------------------|----------------------|--|--|--|--------|
| Smoking status (%)                        |                       |                      |                      |                      |                      |  |  |  | <0.001 |
| Non-smoker                                | 54.76 (53.63, 55.88)  | 58.23 (56.66, 59.78) | 56.97 (55.26, 58.66) | 54.94 (53.42, 56.45) | 48.79 (47.25, 50.33) |  |  |  |        |
| Former smoker                             | 25.13 (24.28, 26.00)  | 24.55 (23.30, 25.85) | 24.60 (23.23, 26.02) | 26.12 (24.65, 27.66) | 25.26 (24.00, 26.56) |  |  |  |        |
| Current smoker                            | 20.11 (19.24, 21.01)  | 17.22 (16.03, 18.48) | 18.44 (17.19, 19.75) | 18.94 (17.85, 20.08) | 25.95 (24.45, 27.51) |  |  |  |        |
| Physical activity (%)                     |                       |                      |                      |                      |                      |  |  |  | <0.001 |
| Inactive                                  | 45.81 (44.18, 47.45)  | 39.32 (36.97, 41.72) | 44.08 (41.77, 46.42) | 47.93 (46.10, 49.77) | 52.15 (50.11, 54.17) |  |  |  |        |
| Moderate                                  | 28.01 (26.94, 29.11)  | 27.48 (25.78, 29.25) | 28.01 (26.30, 29.78) | 29.11 (27.52, 30.76) | 27.43 (25.81, 29.11) |  |  |  |        |
| Vigorous                                  | 8.05 (7.55, 8.59)     | 8.86 (7.84, 9.99)    | 8.74 (7.74, 9.85)    | 7.25 (6.40, 8.20)    | 7.36 (6.37, 8.48)    |  |  |  |        |
| Both moderate and vigorous                | 18.13 (116.98, 19.34) | 24.34 (22.46, 26.33) | 19.17 (17.54, 20.93) | 15.71 (4.27, 17.25)  | 13.07 (11.83, 14.42) |  |  |  |        |
| BMI (kg/m <sup>2</sup> )                  | 29.10 (28.94, 29.26)  | 26.12 (25.94, 26.30) | 28.70 (28.49, 28.90) | 30.28 (30.04, 30.52) | 31.38 (31.17, 31.59) |  |  |  | <0.001 |
| HTN (%)                                   | 38.20 (37.15, 39.25)  | 32.90 (31.30, 34.54) | 36.35 (34.76, 37.96) | 40.33 (38.70, 41.98) | 43.34 (41.78, 44.93) |  |  |  | <0.001 |
| DM (%)                                    | 14.38 (13.77, 15.02)  | 11.47 (10.59, 12.40) | 13.43 (12.48, 14.45) | 14.90 (13.73, 16.15) | 17.76 (16.69, 18.88) |  |  |  | <0.001 |
| CVD (%)                                   | 8.73 (8.25, 9.22)     | 9.42 (8.55, 10.37)   | 8.75 (7.97, 9.60)    | 8.44 (7.65, 9.30)    | 8.28 (7.45, 9.20)    |  |  |  | 0.207  |
| Depression (%)                            | 7.69 (7.24, 8.17)     | 6.48 (5.77, 7.26)    | 7.16 (6.30, 8.12)    | 8.27 (7.46, 9.16)    | 8.89 (8.16, 9.68)    |  |  |  | <0.001 |
| HbA1c (%)                                 | 5.61 (5.60, 5.63)     | 5.44 (5.42, 5.47)    | 5.55 (5.53, 5.57)    | 5.64 (5.61, 5.67)    | 5.82 (5.79, 5.86)    |  |  |  | <0.001 |
| Cholesterol (mmol/L)                      | 5.02 (5.00, 5.05)     | 4.46 (4.43, 4.50)    | 4.77 (4.74, 4.80)    | 5.10 (5.07, 5.13)    | 5.77 (5.73, 5.80)    |  |  |  | <0.001 |
| HDL cholesterol (mmol/L)                  | 1.38 (1.37, 1.39)     | 1.82 (1.80, 1.84)    | 1.45 (1.44, 1.46)    | 1.24 (1.24, 1.25)    | 1.01 (1.00, 1.02)    |  |  |  | <0.001 |
| Antidepressants (%)                       | 13.17 (12.52, 13.84)  | 12.65 (11.66, 13.70) | 13.76 (12.67, 14.93) | 13.25 (12.25, 14.33) | 13.01 (11.83, 14.28) |  |  |  | 0.477  |
| Anxiolytics, sedatives, and hypnotics (%) | 6.78 (6.33, 7.27)     | 7.29 (6.54, 8.12)    | 6.78 (6.07, 7.56)    | 6.31 (5.56, 7.15)    | 6.75 (5.93, 7.68)    |  |  |  | 0.339  |

For continuous variables: survey-weighted mean (95% CI), the *p*-value was by survey-weighted linear regression (svyglm). For categorical variables: survey-weighted percentage (95% CI), the *p*-value was by survey-weighted Chi-square test (svytable).

Abbreviations: DM, diabetes mellitus; CVD: cardiovascular disease; BMI, body mass index; HbA1c, glycosylated hemoglobin; HDL, high-density lipoprotein; HTN, hypertension; PIR, poverty-income ratio (ratio of family income to poverty threshold); SD, standard deviation

### Association between AC and depression

In the fully adjusted model, we observed a linear relationship between AC and depression (Figure 2). The results of the weighted multivariate logistic regression analysis are presented in Table 2. AC was positively correlated with depression in the crude model (odds ratio [OR]= 1.08, 95% confidence interval [CI]:1.06-1.11, *P* <0.001). A significant association between AC and depression was detected in Models 1-3 after adjusting for confounders. In Model 3, all variables were adjusted; for every 1 unit increase in AC, the incidence of depression increased by 3% (OR = 1.03, 95% CI = 1.00–1.06, *P* = 0.039).

**Table 2.** Associations of the atherogenic coefficient with depression (n = 32,502), Weighted.



|                             | Crude Modela        |                 | Model 1b            |                 | Model 2c            |                 | Model 3d            |                 |
|-----------------------------|---------------------|-----------------|---------------------|-----------------|---------------------|-----------------|---------------------|-----------------|
|                             | OR (95% CI)         | <i>p</i> -value | OR (95% CI)         | <i>p</i> -value | OR (95% CI)         | <i>p</i> -value | OR (95% CI)         | <i>p</i> -value |
| Per 1 increase              | 1.08<br>(1.06,1.11) | <0.001          | 1.13<br>(1.10,1.16) | <0.001          | 1.07<br>(1.04,1.10) | <0.001          | 1.03<br>(1.00,1.06) | 0.039           |
| Quartiles                   |                     |                 |                     |                 |                     |                 |                     |                 |
| Q1 (AC: < 1.9310)           | Reference<br>[1]    |                 | Reference<br>[1]    |                 | Reference<br>[1]    |                 | Reference<br>[1]    |                 |
| Q2 (AC: 1.9310 to < 2.6695) | 1.11<br>(0.96,1.30) | 0.166           | 1.18<br>(1.01,1.38) | 0.040           | 1.07<br>(0.91,1.25) | 0.431           | 1.04<br>(0.89,1.22) | 0.589           |
| Q3 (AC: 2.6695 to < 3.6430) | 1.30<br>(1.11,1.53) | 0.001           | 1.48<br>(1.26,1.74) | <0.001          | 1.24<br>(1.07,1.45) | 0.006           | 1.18<br>(1.02,1.38) | 0.034           |
| Q4 (AC: ≥ 3.6430)           | 1.41<br>(1.22,1.62) | <0.001          | 1.75<br>(1.50,2.03) | <0.001          | 1.32<br>(1.14,1.54) | <0.001          | 1.15<br>(0.99,1.33) | 0.074           |
| <i>p</i> for trend          | <0.001              |                 | <0.001              |                 | <0.001              |                 | 0.040               |                 |

Abbreviations: AC, atherogenic coefficient.

aModel 1: Adjusted for age, sex, and race/ethnicity.

bModel 2: Adjusted for the variables in Model 1 plus body mass index, poverty-income ratio, educational level, and marital status.

cModel 3: Adjusted for the variables in Model 2 plus hypertension, diabetes mellitus, alcohol intake, smoking status, physical activity, and glycosylated hemoglobin.

After adjusting for age, sex, race/ethnicity, BMI, PIR, educational level, marital status, HTN, DM, alcohol intake, smoking status, physical activity, and glycosylated hemoglobin compared with participants in the first quartile (AC < 1.9310), the second group (1.9310 to < 2.6695, OR = 1.04, 95% CI = 0.89– 1.22, *P* = 0.589), the third group (2.6695 to < 3.6430, OR = 1.18, 95% CI = 1.02– 1.38, *P* = 0.034), and the fourth group (≥ 3.6430, OR = 1.15, 95% CI = 0.99– 1.33, *P* = 0.074) had an increased prevalence of depression (*P* for trend was significant in all the models).

Furthermore, regarding the interaction between sex and the relationship between AC and depression, the relationship was more significant in females (OR = 1.07, 95% CI = 1.02–1.12, *P* for interaction = 0.027) (Table 3).

**Table 3.** Subgroup analysis of the effect of the atherogenic coefficient on depression (n = 32502), Weight.

| Subgroup | Number of | OR (95% CI) | <i>P</i> for |
|----------|-----------|-------------|--------------|
|----------|-----------|-------------|--------------|



|                                    | participants |                   | interaction |
|------------------------------------|--------------|-------------------|-------------|
| Sex, n (%)                         |              |                   | 0.027       |
| Male                               | 15954        | 1.05 (1.01, 1.10) |             |
| Female                             | 16548        | 1.07 (1.02, 1.12) |             |
| Age, n (%)                         |              |                   | 0.375       |
| 20 – < 40                          | 10857        | 1.07 (1.02, 1.12) |             |
| 40 – < 60                          | 10632        | 1.04 (0.99, 1.09) |             |
| ≥ 60                               | 11013        | 1.04 (0.97, 1.11) |             |
| Race/ethnicity, n (%)              |              |                   | 0.196       |
| Non-Hispanic White                 | 14112        | 1.03 (0.99, 1.08) |             |
| Non-Hispanic Black                 | 6713         | 1.06 (0.98, 1.15) |             |
| Mexican American                   | 5174         | 1.05 (0.97, 1.14) |             |
| Other Hispanic                     | 3109         | 1.12 (1.06, 1.19) |             |
| Other race/multiple races          | 3394         | 1.10 (0.96, 1.26) |             |
| BMI, kg/m <sup>2</sup> , mean (SD) |              |                   | 0.212       |
| Low                                | 10729        | 1.08 (1.00, 1.17) |             |
| Middle                             | 10733        | 1.06 (1.01, 1.12) |             |
| High                               | 10743        | 1.03 (0.99, 1.08) |             |
| Hypertension, n (%)                |              |                   | 0.949       |
| Yes                                | 13940        | 1.04 (1.00, 1.08) |             |
| No                                 | 18562        | 1.06 (1.01, 1.12) |             |
| DM, n (%)                          |              |                   | 0.670       |
| Yes                                | 6152         | 1.03 (0.98, 1.08) |             |
| No                                 | 25761        | 1.07 (1.03, 1.11) |             |

Abbreviations: BMI, body mass index (calculated as weight, in kilograms, divided by the square of height, in meters); DM, diabetes mellitus; HTN, hypertension

## DISCUSSION

This cross-sectional study showed an association between AC and depression in adults in the United States. After adjusting for covariates, a positive linear relationship was found between AC and depression.

The details of the mechanism explaining the relationship between AC and depression need to be further explored, and there may be several possible explanations. Lipids and the immune system interact with one another and have a regulatory effect on each other. Dysregulated inflammation promotes susceptibility to depression [23]. Studies have shown that inflammatory cytokines produced in the periphery enter the cells of the central nervous system and can affect neurotransmitters and neural circuits, producing behavioral symptoms of depression

1  
2  
3  
4 [24]. When T lymphocytes are activated, they not only participate in immune  
5 inflammation but also directly contribute to the development of depression when  
6 functionally impaired [25,26]. Lipid peroxidation and oxidation-specific epitopes are  
7 formed, and the levels of antioxidants such as glutathione, glutathione peroxidase, and  
8 coenzyme Q10 are reduced, resulting in or aggravating oxidative stress [27,28].  
9  
10  
11  
12

13  
14 When lipids are abnormal, the inflammatory, oxidative, and nitrosative  
15 (IO&NS) pathway is further activated [29]. At this time, the increase in binding  
16 globin and high-sensitivity C-reactive protein (CRP) is accompanied by a significant  
17 increase in interleukin-6 (IL-6), tumor necrosis factor- $\alpha$ , interferon- $\gamma$ , other  
18 pro-inflammatory cytokines, and immune inflammation [30]. These factors lead to  
19 defects in serotonin and melatonin through the kynurenine pathway, often considered  
20 one of the main causes of depression [31]. Activation of the IO&NS pathway leads to  
21 mitochondrial and subsequent cellular dysfunction [32]. Previous studies have linked  
22 mitochondrial dysfunction in various brain regions to depression [33].  
23  
24  
25  
26  
27  
28  
29  
30

31  
32 Statins have also been shown to have antidepressant effects when  
33 co-prescribed with antidepressants [34]. Lowering the AC index of patients with  
34 mood disorders improves CVD outcomes [35]. CVD is a heart and blood vessel  
35 disease characterized by myocardial infarction, angina pectoris, heart failure, heart  
36 attack, and stroke [36]. Longer exposure to depression is associated with significantly  
37 increased CVD risk [37]. Factors contributing to the link between depression and  
38 cardiac outcome may include alterations in the autonomic nervous system, platelet  
39 receptors and function, coagulopathic factors, pro-inflammatory cytokines,  
40 endothelial function, neurohormonal factors, and genetic linkages [38]. At the same  
41 time, patient compliance with antidepressant treatment is relatively poor [39].  
42  
43  
44  
45  
46  
47  
48  
49  
50  
51  
52  
53  
54  
55  
56  
57  
58  
59  
60  
Atherosclerosis is a chronic vascular inflammatory disease associated with oxidative  
stress and endothelial dysfunction [40]. Atherosclerosis is the underlying cause of  
CVD, and AC is a major indicator of atherosclerosis [41]. Our results suggest that AC  
may play a role in depression. AC may indicate the relationship between CVD and  
depression and a potential target and marker for treating depression or depression  
combined with CVD. The relevant mechanisms remain to be explored further.

1  
2  
3  
4 Our study found increased odds of depression with increased AC in adults,  
5 demonstrating that controlling AC may be beneficial for preventing depression. Sex  
6 may affect this relationship. In the subgroup analysis (Table 3), we found a stronger  
7 relationship between AC and depression in females. The synergistic effect of estrogen  
8 on cognitive and emotional functions may underlie the association between ovarian  
9 hormone fluctuations and depression in females [42]. The induction of indoleamine 2,  
10 3-dioxygenase, and deleterious effects of tryptophan catabolizing metabolites  
11 (TRYCATs) play a role in the pathophysiology of depression. Activation of IDO  
12 decreases plasma tryptophan levels and increases TRYCAT synthesis in depressed  
13 individuals. Females showed more IDO activation and TRYCAT production after  
14 immune challenge than males [43]. Therefore, this sex difference in immune  
15 dysregulation may contribute to higher levels of anxiety and depression experienced  
16 by females.  
17  
18  
19  
20  
21  
22  
23  
24  
25  
26  
27  
28

29 This study has some limitations. First, this was a cross-sectional study;  
30 therefore, we could not determine a causal relationship between AC and depression.  
31 Second, the PHQ-9 is a proven, simple, and effective tool for identifying the severity  
32 of depressive symptoms, but it is not a diagnostic tool for MDD. Third, the  
33 relationship we studied may have been influenced by other confounding factors,  
34 which we have not adjusted. Fourth, the differences in demographics and population  
35 characteristics in the United States may limit the generalizability of the findings to  
36 other countries or regions.  
37  
38  
39  
40  
41  
42  
43  
44  
45  
46  
47

## 48 CONCLUSIONS

49 Our research shows that higher AC levels in American adults are positively related to  
50 a higher prevalence of depression. Further studies are required to explore the  
51 underlying mechanisms and potential benefits of controlling AC levels in patients  
52 with depression.  
53  
54  
55  
56  
57

58 **Funding:** This work was supported by the Shandong Traditional Chinese Medicine Science  
59 and Technology Development Project under Grant 2019-0178.  
60

1  
2  
3  
4 **Competing Interests:** This research received no specific grant from any funding agency in  
5 the public, commercial, or not-for-profit sectors.  
6

7 **Author Contributions:** Conceptualization, L Zhang, J Yin; methodology, L Zhang; software,  
8 J Yin; validation, H Sun, Y Liu and J Yang; formal analysis, L Zhang, J Yin, and H Sun;  
9 investigation, L Zhang; resources, L Zhang; data curation, H Sun; writing—original draft  
10 preparation, L Zhang; writing—review and editing, Y Liu and J Yang; visualization, J Yin;  
11 supervision, Y Liu and J Yang; project administration, L Zhang. All authors have read and  
12 agreed to the published version of the manuscript.  
13  
14  
15  
16  
17  
18

19 **Acknowledgments:** Thanks to the acupuncture-medicine team. Thanks to Prof. Liu and Prof.  
20 Yang for their careful teaching. Thanks to our colleagues for their help. Thanks to all who  
21 contributed to the manuscript.  
22  
23  
24

25 **Data Sharing Statement:** The datasets generated and/or analyzed during the current study  
26 are available in the NHANES repository [<https://www.cdc.gov/nchs/nhanes/>].  
27  
28  
29  
30

### 31 **References**

- 32  
33 [1]McCarron RM, Shapiro B, Rawles J, et al. Depression. *Ann Intern Med.*  
34 2021;174:ITC65–ITC80.  
35  
36 [2]Malhi GS, Mann JJ. Depression. *Lancet.* 2018;392:2299–2312.  
37  
38 [3]Stringaris A. Editorial: what is depression? *J Child Psychol Psychiatry.*  
39 2017;58:1287–1289.  
40  
41 [4]Reeder N, Tolar-Peterson T, Bailey RH, et al. Food Insecurity and Depression  
42 among US Adults: NHANES 2005-2016. *Nutrients.* 2022;14:3081.  
43  
44 [5]Meng R, Yu C, Liu N, et al. Association of Depression With All-Cause and  
45 Cardiovascular Disease Mortality Among Adults in China. *JAMA Netw Open.*  
46 2020;3:e1921043.  
47  
48 [6]Hao Y, Ge H, Sun M, et al. Selecting an appropriate animal model of depression.  
49 *Int J Mol Sci.* 2019;20:4827.  
50  
51 [7]Edinoff AN, Akuly HA, Hanna TA, et al. Selective Serotonin Reuptake Inhibitors  
52 and Adverse Effects: A Narrative Review. *Neurol Int.* 2021;13:387-401.  
53  
54 [8]Andrews B, Klein B, Van Nguyen H, et al. Efficacy of a Digital Mental Health  
55 Biopsychosocial Transdiagnostic Intervention With or Without Therapist  
56  
57  
58  
59  
60

- 1  
2  
3 Assistance for Adults With Anxiety and Depression: Adaptive Randomized  
4 Controlled Trial. *J Med Internet Res*. 2023;25:e45135.  
5  
6 [9]Milaneschi Y, Simmons WK, van Rossum EFC, et al. Depression and obesity:  
7 evidence of shared biological mechanisms. *Mol Psychiatry*. 2019;24:18–33.  
8  
9 [10]Able AA, Richard AJ, Stephens JM. TNF $\alpha$  Effects on Adipocytes Are Influenced  
10 by the Presence of Lysine Methyltransferases, G9a (EHMT2) and GLP  
11 (EHMT1). *Biology (Basel)*. 2023;12:674.  
12  
13 [11]Otte C, Gold SM, Penninx BW, et al. Major depressive disorder. *Nat Rev Dis*  
14 *Primers*. 2016;2:16065.  
15  
16 [12]Beverly JK, Budoff MJ. Atherosclerosis: pathophysiology of insulin resistance,  
17 hyperglycemia, hyperlipidemia, and inflammation. *J Diabetes*. 2020;12:102–104.  
18  
19 [13]Mahdavi-Roshan M, Shoaibinobarian N, Noormohammadi M, et al. Inflammatory  
20 Markers and Atherogenic Coefficient: Early Markers of Metabolic Syndrome. *Int*  
21 *J Endocrinol Metab*. 2022;20:e127445.  
22  
23 [14]Nunes SO, Piccoli de Melo LG, Pizzo de Castro MR, et al. Atherogenic index of  
24 plasma and atherogenic coefficient are increased in major depression and bipolar  
25 disorder, especially when comorbid with tobacco use disorder. *J Affect Disord*.  
26 2015;172:55–62.  
27  
28 [15]Tao SH, Ren XQ, Zhang LJ, et al. Association between common cardiovascular  
29 drugs and depression. *Chin Med J (Engl)*. 2021;134:2656–2665.  
30  
31 [16]Walker AJ, Kim Y, Borissiouk I, et al. Statins: neurobiological underpinnings and  
32 mechanisms in mood disorders. *Neurosci Biobehav Rev*. 2021;128:693–708.  
33  
34 [17]Fain JA. NHANES. *Diabetes Educ*. 2017;43:151.  
35  
36 [18]Patel JS, Oh Y, Rand KL, et al. Measurement invariance of the patient health  
37 questionnaire-9 (PHQ-9) depression screener in U.S. adults across sex,  
38 race/ethnicity, and education level: NHANES 2005-2016. *Depress Anxiety*.  
39 2019;36:813-823.  
40  
41 [19]Levis B, Benedetti A, Thombs BD, et al. Accuracy of Patient Health  
42 Questionnaire-9 (PHQ-9) for screening to detect major depression: individual  
43 participant data meta-analysis. *BMJ*. 2019;365:11476.  
44  
45 [20]Brooks JM, Titus AJ, Bruce ML, et al. Depression and handgrip strength among  
46 U.S. adults aged 60 years and older from NHANES 2011-2014. *J Nutr Health*  
47 *Aging*. 2018;22:938–943.  
48  
49  
50  
51  
52  
53  
54  
55  
56  
57  
58  
59  
60

- 1  
2  
3 [21]Levis B, Benedetti A, Thombs BD; DEPRESSion Screening Data (DEPRESSD)  
4 Collaboration. Accuracy of Patient Health Questionnaire-9 (PHQ-9) for screening  
5 to detect major depression: individual participant data meta-analysis. *BMJ*.  
6 2019;365:11476.  
7  
8  
9  
10 [22]Stekhoven DJ, Bühlmann P. MissForest—non-parametric missing value  
11 imputation for mixed-type data. *Bioinformatics*. 2012;28:112–118.  
12  
13 [23]Beurel E, Toups M, Nemeroff CB. The bidirectional relationship of depression  
14 and inflammation: double trouble. *Neuron*. 2020;107:234–256.  
15  
16 [24]Capuron L, Lasselín J, Castanon N. Role of adiposity-driven inflammation in  
17 depressive morbidity. *Neuropsychopharmacology*. 2017;42:115–128.  
18  
19 [25]Haapakoski R, Ebmeier KP, Alenius H, et al. Innate and adaptive immunity in the  
20 development of depression: an update on current knowledge and technological  
21 advances. *Prog Neuropsychopharmacol Biol Psychiatry*. 2016;66:63–72.  
22  
23 [26]Miller AH. Depression and immunity: a role for T cells? *Brain Behav Immun*.  
24 2010;24:1–8.  
25  
26 [27]Bartolini Gritti B, Binder CJ. Oxidation-specific epitopes are major targets of  
27 innate immunity in atherothrombosis. *Hamostaseologie*. 2016;36:89–96.  
28  
29 [28]Maes M, Mihaylova I, Kubera M, et al. Increased plasma peroxides and serum  
30 oxidized low density lipoprotein antibodies in major depression: markers that  
31 further explain the higher incidence of neurodegeneration and coronary artery  
32 disease. *J Affect Disord*. 2010;125:287–94.  
33  
34 [29]Morris G, Puri BK, Walker AJ, et al. Shared pathways for neuroprogression and  
35 somatoprogession in neuropsychiatric disorders. *Neurosci Biobehav Rev*.  
36 2019;107:862–882.  
37  
38 [30]Maes M, Ruckoanich P, Chang YS, et al. Multiple aberrations in shared  
39 inflammatory and oxidative & nitrosative stress (IO&NS) pathways explain the  
40 co-association of depression and cardiovascular disorder (CVD), and the  
41 increased risk for CVD and due mortality in depressed patients. *Prog*  
42 *Neuropsychopharmacol Biol Psychiatry*. 2011;35:769–783.  
43  
44 [31]Gałecki P, Talarowska M. Inflammatory theory of depression. *Psychiatr Pol*.  
45 2018;52:437–447.  
46  
47 [32]Mezzaroba L, Alfieri DF, Colado Simão AN, et al. The role of zinc, copper,  
48 manganese and iron in neurodegenerative diseases. *Neurotoxicology*.  
49 2019;74:230–241.  
50  
51  
52  
53  
54  
55  
56  
57  
58  
59  
60

- 1  
2  
3 [33]Bansal Y, Kuhad A. Mitochondrial dysfunction in depression. *Curr*  
4 *Neuropharmacol.* 2016;4:610–618.  
5  
6 [34]Singh D, Lippmann S. Can statins diminish depression? *Prim Care Companion*  
7 *CNS Disord.* 2018;20:17br02169.  
8  
9 [35]Zhang Y, Chen Y, Ma L. Depression and cardiovascular disease in elderly:  
10 current understanding. *J Clin Neurosci.* 2018;47:1–5.  
11  
12 [36]Xu C, Liang J, Xu S, et al. Increased serum levels of aldehydes are associated  
13 with cardiovascular disease and cardiovascular risk factors in adults. *J Hazard*  
14 *Mater.* 2020;400:123134.  
15  
16 [37]Zhang Y, Li X, Chan VKY, et al. Depression duration and risk of incident  
17 cardiovascular disease: A population-based six-year cohort study. *J Affect Disord.*  
18 2022;305:188-195.  
19  
20 [38]de Jonge P, Rosmalen JG, Kema IP, et al. Psychophysiological biomarkers  
21 explaining the association between depression and prognosis in coronary artery  
22 patients: a critical review of the literature. *Neurosci Biobehav Rev.* 2010;35:84–  
23 90.  
24  
25 [39]Shrestha Manandhar J, Shrestha R, Basnet N, et al. Study of Adherence Pattern  
26 of Antidepressants in Patients with Depression. *Kathmandu Univ Med J (KUMJ).*  
27 2017;15:3-9.  
28  
29 [40]Marchio P, Guerra-Ojeda S, Vila JM, et al. Targeting early atherosclerosis: a  
30 focus on oxidative stress and inflammation. *Oxid Med Cell Longev.*  
31 2019;2019:8563845.  
32  
33 [41]Nitsa A, Toutouza M, Machairas N, et al. Vitamin D in cardiovascular disease. *In*  
34 *Vivo.* 2018;32:977–981.  
35  
36 [42]Albert KM, Newhouse PA. Estrogen, stress, and depression: cognitive and  
37 biological interactions. *Annu Rev Clin Psychol.* 2019;15:399–423.  
38  
39 [43]Maes M, Leonard BE, Myint AM, et al. The new ‘5-HT’ hypothesis of depression:  
40 cell-mediated immune activation induces indoleamine 2,3-dioxygenase, which  
41 leads to lower plasma tryptophan and an increased synthesis of detrimental  
42 tryptophan catabolites (TRYCATs), both of which contribute to the onset of  
43 depression. *Prog Neuropsychopharmacol Biol Psychiatry.* 2011;35:702–721.  
44  
45  
46  
47  
48  
49  
50  
51  
52  
53  
54  
55  
56  
57  
58  
59  
60

## FIGURE LEGENDS



1  
2  
3  
4 **Figure 1.** Flowchart for inclusion of study participants.

5 **Figure 2.** Association between AC and depression in US adults (n=4759). The black  
6 vertical line on the horizontal axis represents the AC distribution, the red line  
7 represents the best fit, and the difference between the dashed lines represents the 95%  
8 confidence interval. The data was adjusted for age, sex, race/ethnicity, body mass  
9 index, poverty-income ratio, educational level, marital status, hypertension, diabetes  
10 mellitus, alcohol intake, smoking status, physical activity, and glycosylated  
11 hemoglobin.  
12  
13  
14  
15  
16  
17  
18  
19  
20  
21  
22  
23  
24  
25  
26  
27  
28  
29  
30  
31  
32  
33  
34  
35  
36  
37  
38  
39  
40  
41  
42  
43  
44  
45  
46  
47  
48  
49  
50  
51  
52  
53  
54  
55  
56  
57  
58  
59  
60

For peer review only



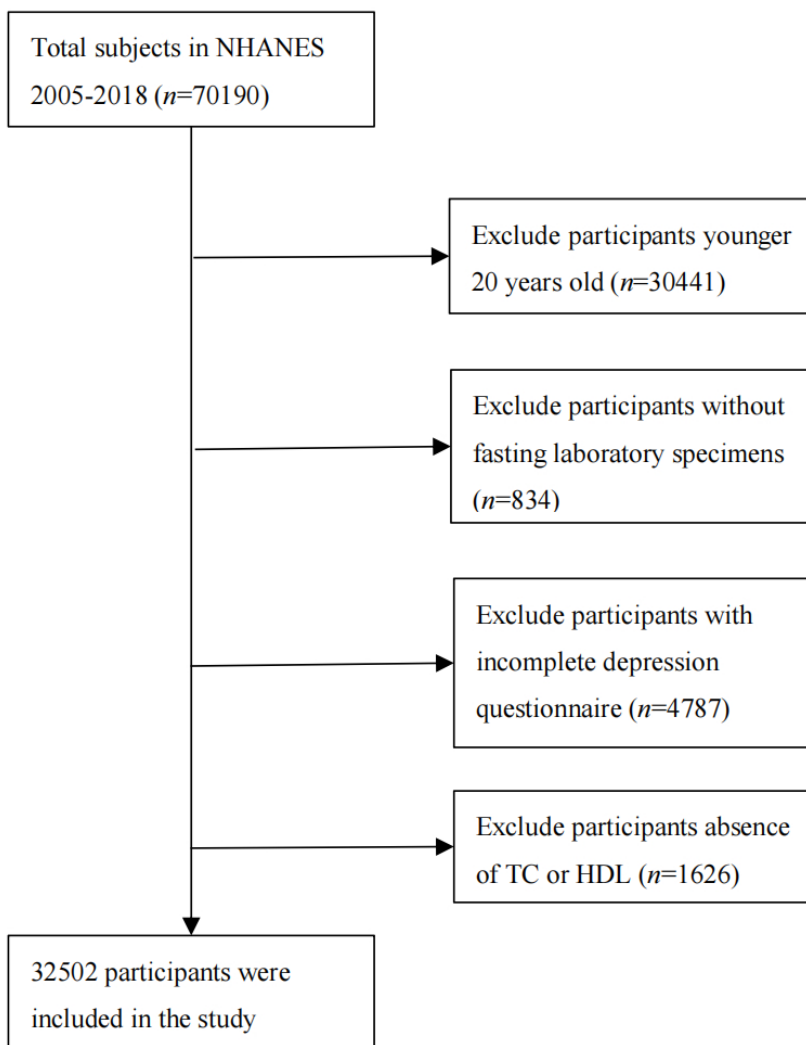

Figure 1. Flowchart for inclusion of study participants.

Flowchart for inclusion of study participants.

114x140mm (200 x 200 DPI)

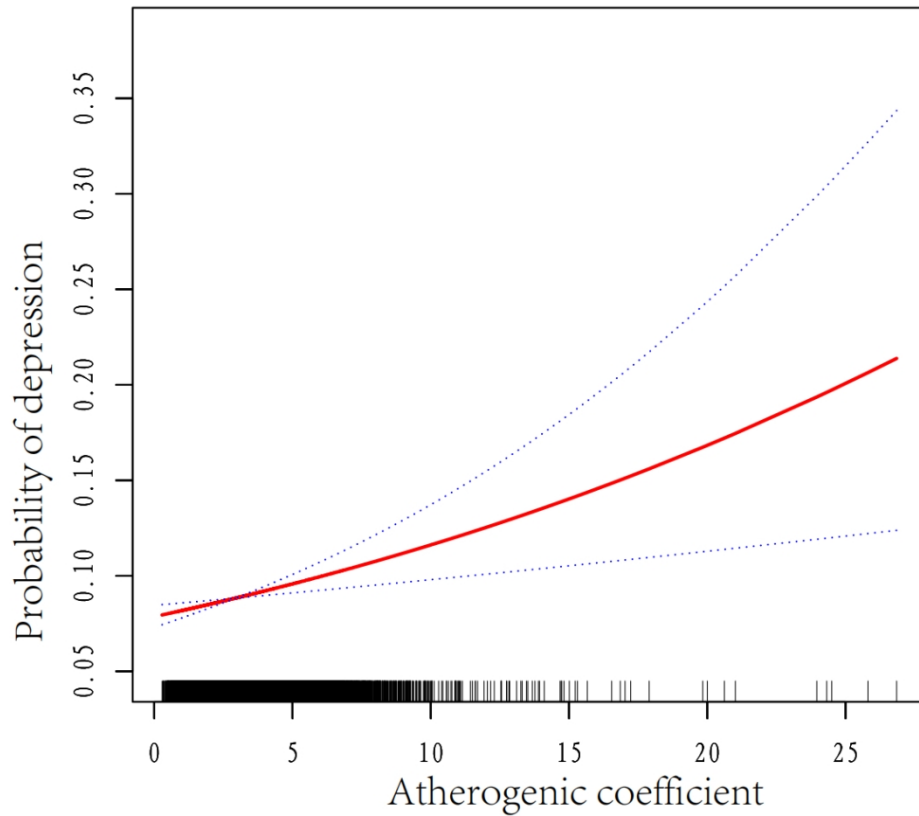

Association between AC and depression in US adults (n=4759). The black vertical line on the horizontal axis represents the caffeine distribution, the red line represents the best fit, and the difference between the dashed lines represents the 95% confidence interval. The data was adjusted for age, sex, race/ethnicity, body mass index, poverty-income ratio, educational level, marital status, hypertension, diabetes mellitus, alcohol intake, smoking status, physical activity, and glycosylated hemoglobin.

152x152mm (200 x 200 DPI)

**Table S1.** Missing covariates of study participants (n = 32502)

| Variable                | Number of patients (% missing) |
|-------------------------|--------------------------------|
| Age                     | 0 (0%)                         |
| Sex                     | 0 (0%)                         |
| Race/ethnicity          | 0 (0%)                         |
| Educational level       | 23 (0.07%)                     |
| Marital status          | 16 (0.04%)                     |
| Poverty-income ratio    | 2767 (8.51%)                   |
| Body mass index         | 297 (0.91%)                    |
| Alcohol intake          | 4661 (14.34%)                  |
| Smoking status          | 17 (0.05%)                     |
| Physical activity       | 4102 (12.62%)                  |
| Hypertension            | 0 (0%)                         |
| Diabetes mellitus       | 589 (1.81%)                    |
| Glycosylated hemoglobin | 58 (0.18%)                     |

**STROBE 2007 (v4) Statement—Checklist of items that should be included in reports of *cross-sectional studies***

| Section/Topic                | Item # | Recommendation                                                                                                                                                                       | Reported on page # |
|------------------------------|--------|--------------------------------------------------------------------------------------------------------------------------------------------------------------------------------------|--------------------|
| <b>Title and abstract</b>    | 1      | (a) Indicate the study’s design with a commonly used term in the title or the abstract                                                                                               | 2                  |
|                              |        | (b) Provide in the abstract an informative and balanced summary of what was done and what was found                                                                                  | 2                  |
| <b>Introduction</b>          |        |                                                                                                                                                                                      |                    |
| Background/rationale         | 2      | Explain the scientific background and rationale for the investigation being reported                                                                                                 | 3                  |
| Objectives                   | 3      | State specific objectives, including any prespecified hypotheses                                                                                                                     | 4                  |
| <b>Methods</b>               |        |                                                                                                                                                                                      |                    |
| Study design                 | 4      | Present key elements of study design early in the paper                                                                                                                              |                    |
| Setting                      | 5      | Describe the setting, locations, and relevant dates, including periods of recruitment, exposure, follow-up, and data collection                                                      |                    |
| Participants                 | 6      | (a) Give the eligibility criteria, and the sources and methods of selection of participants                                                                                          | 4                  |
| Variables                    | 7      | Clearly define all outcomes, exposures, predictors, potential confounders, and effect modifiers. Give diagnostic criteria, if applicable                                             | 5-6                |
| Data sources/<br>measurement | 8*     | For each variable of interest, give sources of data and details of methods of assessment (measurement). Describe comparability of assessment methods if there is more than one group | 5-6                |
| Bias                         | 9      | Describe any efforts to address potential sources of bias                                                                                                                            | 6-7                |
| Study size                   | 10     | Explain how the study size was arrived at                                                                                                                                            | 4                  |
| Quantitative variables       | 11     | Explain how quantitative variables were handled in the analyses. If applicable, describe which groupings were chosen and why                                                         | 5-6                |
| Statistical methods          | 12     | (a) Describe all statistical methods, including those used to control for confounding                                                                                                | 6-7                |
|                              |        | (b) Describe any methods used to examine subgroups and interactions                                                                                                                  | 5                  |
|                              |        | (c) Explain how missing data were addressed                                                                                                                                          | 7                  |
|                              |        | (d) If applicable, describe analytical methods taking account of sampling strategy                                                                                                   |                    |
|                              |        | (e) Describe any sensitivity analyses                                                                                                                                                |                    |
| <b>Results</b>               |        |                                                                                                                                                                                      |                    |

|                          |     |                                                                                                                                                                                                                                                                                                                                                                                                               |       |
|--------------------------|-----|---------------------------------------------------------------------------------------------------------------------------------------------------------------------------------------------------------------------------------------------------------------------------------------------------------------------------------------------------------------------------------------------------------------|-------|
| Participants             | 13* | (a) Report numbers of individuals at each stage of study—eg numbers potentially eligible, examined for eligibility, confirmed eligible, included in the study, completing follow-up, and analysed<br>(b) Give reasons for non-participation at each stage<br>(c) Consider use of a flow diagram                                                                                                               | 7     |
| Descriptive data         | 14* | (a) Give characteristics of study participants (eg demographic, clinical, social) and information on exposures and potential confounders<br>(b) Indicate number of participants with missing data for each variable of interest                                                                                                                                                                               | 4     |
| Outcome data             | 15* | Report numbers of outcome events or summary measures                                                                                                                                                                                                                                                                                                                                                          | 7     |
| Main results             | 16  | (a) Give unadjusted estimates and, if applicable, confounder-adjusted estimates and their precision (eg, 95% confidence interval). Make clear which confounders were adjusted for and why they were included<br>(b) Report category boundaries when continuous variables were categorized<br>(c) If relevant, consider translating estimates of relative risk into absolute risk for a meaningful time period | 5-6   |
| Other analyses           | 17  | Report other analyses done—eg analyses of subgroups and interactions, and sensitivity analyses                                                                                                                                                                                                                                                                                                                | 12    |
| <b>Discussion</b>        |     |                                                                                                                                                                                                                                                                                                                                                                                                               |       |
| Key results              | 18  | Summarise key results with reference to study objectives                                                                                                                                                                                                                                                                                                                                                      | 13-14 |
| Limitations              | 19  | Discuss limitations of the study, taking into account sources of potential bias or imprecision. Discuss both direction and magnitude of any potential bias                                                                                                                                                                                                                                                    | 15    |
| Interpretation           | 20  | Give a cautious overall interpretation of results considering objectives, limitations, multiplicity of analyses, results from similar studies, and other relevant evidence                                                                                                                                                                                                                                    |       |
| Generalisability         | 21  | Discuss the generalisability (external validity) of the study results                                                                                                                                                                                                                                                                                                                                         | 15    |
| <b>Other information</b> |     |                                                                                                                                                                                                                                                                                                                                                                                                               |       |
| Funding                  | 22  | Give the source of funding and the role of the funders for the present study and, if applicable, for the original study on which the present article is based                                                                                                                                                                                                                                                 | 15    |

\*Give information separately for cases and controls in case-control studies and, if applicable, for exposed and unexposed groups in cohort and cross-sectional studies.

**Note:** An Explanation and Elaboration article discusses each checklist item and gives methodological background and published examples of transparent reporting. The STROBE checklist is best used in conjunction with this article (freely available on the Web sites of PLoS Medicine at <http://www.plosmedicine.org/>, Annals of Internal Medicine at <http://www.annals.org/>, and Epidemiology at <http://www.epidem.com/>). Information on the STROBE Initiative is available at [www.strobe-statement.org](http://www.strobe-statement.org).

# BMJ Open

## Association between atherogenic coefficient and depression in US adults: a cross-sectional study with data from National Health and Nutrition Examination Survey 2005-2018

|                                 |                                                                                                                                                                                                                                                                                                                                                                |
|---------------------------------|----------------------------------------------------------------------------------------------------------------------------------------------------------------------------------------------------------------------------------------------------------------------------------------------------------------------------------------------------------------|
| Journal:                        | <i>BMJ Open</i>                                                                                                                                                                                                                                                                                                                                                |
| Manuscript ID                   | bmjopen-2023-074001.R2                                                                                                                                                                                                                                                                                                                                         |
| Article Type:                   | Original research                                                                                                                                                                                                                                                                                                                                              |
| Date Submitted by the Author:   | 03-Oct-2023                                                                                                                                                                                                                                                                                                                                                    |
| Complete List of Authors:       | Zhang, Lu; Shandong University of Traditional Chinese Medicine<br>Yin, Jiahui; Shandong University of Traditional Chinese Medicine<br>Sun, Haiyang; Guangzhou University of Chinese Medicine<br>Yang, Jiguo; Shandong University of Traditional Chinese Medicine<br>Liu, Yuanxiang; Affiliated Hospital of Shandong University of Traditional Chinese Medicine |
| <b>Primary Subject Heading</b>: | Mental health                                                                                                                                                                                                                                                                                                                                                  |
| Secondary Subject Heading:      | Health services research                                                                                                                                                                                                                                                                                                                                       |
| Keywords:                       | Risk Factors, Adult psychiatry < PSYCHIATRY, Depression & mood disorders < PSYCHIATRY, Lipid disorders < DIABETES & ENDOCRINOLOGY                                                                                                                                                                                                                              |
|                                 |                                                                                                                                                                                                                                                                                                                                                                |

SCHOLARONE™  
Manuscripts



I, the Submitting Author has the right to grant and does grant on behalf of all authors of the Work (as defined in the below author licence), an exclusive licence and/or a non-exclusive licence for contributions from authors who are: i) UK Crown employees; ii) where BMJ has agreed a CC-BY licence shall apply, and/or iii) in accordance with the terms applicable for US Federal Government officers or employees acting as part of their official duties; on a worldwide, perpetual, irrevocable, royalty-free basis to BMJ Publishing Group Ltd ("BMJ") its licensees and where the relevant Journal is co-owned by BMJ to the co-owners of the Journal, to publish the Work in this journal and any other BMJ products and to exploit all rights, as set out in our [licence](#).

The Submitting Author accepts and understands that any supply made under these terms is made by BMJ to the Submitting Author unless you are acting as an employee on behalf of your employer or a postgraduate student of an affiliated institution which is paying any applicable article publishing charge ("APC") for Open Access articles. Where the Submitting Author wishes to make the Work available on an Open Access basis (and intends to pay the relevant APC), the terms of reuse of such Open Access shall be governed by a Creative Commons licence – details of these licences and which [Creative Commons](#) licence will apply to this Work are set out in our licence referred to above.

Other than as permitted in any relevant BMJ Author's Self Archiving Policies, I confirm this Work has not been accepted for publication elsewhere, is not being considered for publication elsewhere and does not duplicate material already published. I confirm all authors consent to publication of this Work and authorise the granting of this licence.

1  
2  
3  
4 **Association between atherogenic coefficient and depression in US**  
5  
6 **adults: a cross-sectional study with data from National Health and**  
7  
8 **Nutrition Examination Survey 2005-2018**  
9  
10

11 **Lu Zhang<sup>a1</sup>, Jiahui Yin<sup>b1</sup>, Haiyang Sun<sup>c1</sup>, Jiguo Yang<sup>d\*</sup>, Yuanxiang Liu<sup>e\*</sup>**

12 *<sup>a</sup>Shandong University of Traditional Chinese Medicine, Jinan, China.*

13 *<sup>b</sup>Shandong University of Traditional Chinese Medicine, Jinan, China.*

14 *<sup>c</sup>Guangzhou University of Chinese Medicine, Guangzhou, China.*

15 *<sup>d</sup>Shandong University of Traditional Chinese Medicine, Jinan, China.*

16 *<sup>e</sup>Affiliated Hospital of Shandong University of Traditional Chinese Medicine, Jinan,*  
17 *China.*

18 \* Correspondence: Yuanxiang Liu: lyxlwtg001@163.com;

19 Address: No.16369 Jingshi Road, Lixia District, Jinan, China

20 <sup>1</sup>These authors contributed equally to this work  
21  
22  
23  
24  
25  
26  
27  
28  
29  
30  
31  
32  
33  
34  
35  
36  
37  
38  
39  
40  
41  
42  
43  
44  
45  
46  
47  
48  
49  
50  
51  
52  
53  
54  
55  
56  
57  
58  
59  
60



## ABSTRACT

**Objective:** The pathogenesis of depression is related to immune inflammatory response. AC is an important indicator of lipid abnormalities, which can lead to immune inflammatory responses. However, no study has investigated the relationship between AC and depression in adult Americans. Therefore, we investigated this relationship.

**Design:** This study used a cross-sectional design.

**Setting:** The National Health and Nutrition Examination Survey (2005-2018) data were used for this study.

**Participants:** A total of 32502 participants aged 20 years or older who had complete information for AC and depression were included in this study.

**Primary and secondary outcome measures:** Depressive symptoms were assessed using the nine-item version of the Patient Health Questionnaire (PHQ-9), with a cutoff point of 9/10 indicating likely depression cases. Weighted logistic regression analyses and the smooth curve fittings were performed to explore the association between AC and depression.

**Results:** After adjusting for potential confounders, a single unit increase in AC was associated with a 3% increase in the prevalence of depression (hazard ratio =1.03, 95% confidence interval =1.00-1.06,  $P = 0.039$ ). The relationship between AC and depression was more obvious in females.

**Conclusions:** The AC is positively associated with depression.

### Strengths and Limitations:

- The quality and scale of the National Health and Nutrition Examination Survey database ensured our results' statistical power and reliability.
- A wide range of sociodemographic, lifestyle, and physical health covariates were adjusted to reduce residual confounding.
- Its cross-sectional design limited this study, and no causal relationships could be determined.
- The PHQ-9 is a proven, simple, and effective tool for identifying the severity of depressive symptoms, but it is not a diagnostic tool for major depressive disorder (MDD).

## INTRODUCTION

Depression is a clinically common emotional state characterized by persistent sadness or inability to experience pleasure, accompanied by deficits in daily functioning [1].

In 2008, the World Health Organization (WHO) ranked major depression as the third leading cause of the global disease burden and projected that it would be the number one cause by 2030 [2]. More than 300 million people worldwide suffer from major depressive disorder (MDD) [3], affecting about 8% of adults in the US [4].

Depression can cause various adverse events, seriously endangering lives and global health [5,6]. Current antidepressant treatments are effective, but there are many side effects; for example, antidepressants may increase suicidal thoughts in some people [7]. Evidence supports screening for depression and providing early intervention [8]. Therefore, it is necessary to explore the factors related to depression.

Abnormal lipid metabolism leads to many pathological changes. Firstly, activation of the pro-inflammatory response leads to a decrease in high-density lipoprotein (HDL) and phospholipids and a compensatory increase in phospholipid-rich low-density lipoprotein (LDL), which in turn slows total cholesterol (TC) metabolism and affects neurotransmitters and neural circuits [9]. However, cytokine signaling in adipose tissue, particularly tumor necrosis factor (TNF), promotes metabolic dysregulation [10]. In addition, some studies have shown that changes in circulating lipid concentrations may be associated with depression [11]. Abnormal lipids are involved in the formation of atherosclerosis. The pathogenesis of atherosclerosis is based on the lipid theory, and the explanation is related to excess cholesterol being the sole cause of lipid deposition in the arterial wall [12]. Atherosclerosis can cause cardiovascular disease (CVD), stroke, etc., often co-morbidities with depression.

The atherogenic coefficient (AC) is an important index for assessing the degree of atherosclerosis, calculated as  $(TC - HDL)/HDL$  [13]. Nunes et al. found that AC was elevated in patients with MDD and bipolar disorder [14]. AC and depression can be controlled using statins and other cardiovascular drugs [15,16].

1  
2  
3  
4 Exploring the role of AC in depression may be beneficial for treating  
5 depression and its complications. Therefore, we used data from the National Health  
6 and Nutrition Examination Survey (NHANES) database to explore the association of  
7 AC with depression in adults.  
8  
9  
10

## 11 12 13 14 **METHODS**

### 15 16 **Study design and participants**

17 Data of the participants in this study were obtained from the NHANES database, a  
18 major program conducted by the Centers for Disease Control and Prevention (CDC)  
19 to assess the health and nutritional status of 5,000 adults and children in the US  
20 annually [17]. The NHANES database contains demographic, dietary, examination,  
21 laboratory, and questionnaire data. The National Center for Health Statistics (NCHS)  
22 Research Ethics Review Board (ERB) authorized the NHANES study protocols.  
23 Further information regarding the NHANES data can be obtained from its official  
24 website (<http://www.cdc.gov/nchs/nhanes.htm>).  
25  
26  
27  
28  
29  
30  
31  
32

33 Participants in our study were screened according to the following inclusion  
34 criteria: 1) aged 20 years or above and 2) participation in laboratory tests on an empty  
35 stomach. The exclusion criteria were: 1) incomplete Patient Health Questionnaire-9  
36 (PHQ-9) and 2) no data on TC or HDL cholesterol levels.  
37  
38  
39  
40

### 41 **Assessment of depression**

42 The PHQ-9 is used to assess depression. The PHQ-9 contains nine items that capture  
43 the frequency of depressive symptoms: appetite problems, fatigue, sleep difficulties,  
44 psychomotor retardation or agitation, concentration problems, lack of interest,  
45 depressed mood, feelings of worthlessness, and suicidal ideation. It is now widely  
46 accepted as an accurate and reliable method for screening depression [18,19]. Each  
47 question is scored from '0' (not at all) to '3' (nearly every day), with a total score of  
48 0–27, where a score  $\geq 10$  is considered clinically relevant depression (CRD) [20].  
49 PHQ-9 sensitivity compared with semi-structured diagnostic interviews was greater  
50 than previous conventional meta-analyses that combined reference standards. A 10- or  
51  
52  
53  
54  
55  
56  
57  
58  
59  
60

1  
2  
3  
4 above cutoff score maximized the overall sensitivity and specificity for subgroups  
5 [21].  
6

### 7 **Assessment of AC**

8  
9 Fasting blood was drawn from individuals aged  $\geq 20$  years, and the blood samples  
10 were processed, stored, and shipped to the Johns Hopkins University Lipoprotein  
11 Assay Laboratory at the Ambulator-Testing Center laboratory. HDL cholesterol levels  
12 were measured directly in the serum. The apolipoprotein B (apo B)-containing  
13 lipoproteins in the specimen were reacted with a blocking reagent that rendered them  
14 non-reactive with the enzymatic cholesterol reagent under the assay conditions.  
15 Reagents were purchased from Roche/Boehringer-Mannheim Diagnostics  
16 (Mannheim, Germany). The method uses sulfated alpha-cyclodextrin in the presence  
17 of  $Mg^{+2}$ , which forms complexes with apoB-containing lipoproteins and polyethylene  
18 glycol-coupled cholesteryl esterase and cholesterol oxidase for HDL cholesterol  
19 measurement. HDL cholesterol data collected from participants in 2005-2006 were  
20 adjusted using the following equation: corrected HDL = (Solomon Park assigned  
21 HDL value)  $\times$  (participant HDL). TC was measured enzymatically in the serum or  
22 plasma in a series of coupled reactions that hydrolyze cholesteryl esters and oxidize  
23 the 3-OH cholesterol group. All the information can be obtained from  
24 <https://wwwn.cdc.gov/Nchs/Nhanes/>.  
25  
26  
27  
28  
29  
30  
31  
32  
33  
34  
35  
36  
37  
38  
39

### 40 **Assessment of covariates**

41  
42 Covariates in this study, including body mass index (BMI), alcohol intake, and  
43 glycosylated hemoglobin (HbA1c), were used as continuous variables. BMI was  
44 measured as weight (kg) divided by height (m) squared with  $<25.0$  kg/m<sup>2</sup> indicating  
45 normal, 25.0 to  $<30.0$  kg/m<sup>2</sup> indicating overweight,  $\geq 30.0$  kg/m<sup>2</sup> indicating obesity.  
46 Alcohol intake was determined by extracting the mean alcohol intake from the first  
47 and second dietary surveys, considering a single day's intake for participants who  
48 consumed alcohol at least once. Physical activity was self-reported by participants as  
49 either inactive, moderate, or vigorous. Categorical variables included age (20–40  
50 years, 40–60 years,  $\geq 60$  years), sex (male or female), and race/ethnicity (non-Hispanic  
51 white, non-Hispanic black, Mexican American, other Hispanic, or other race/multiple  
52  
53  
54  
55  
56  
57  
58  
59  
60

1  
2  
3  
4 races). The poverty-income ratio (PIR) was defined as the ratio of family income to  
5 poverty threshold ( $<1$  indicating an income below the poverty threshold and  $\geq 1$   
6 indicating an income above the poverty threshold. The latter category was further  
7 classified into two groups: 1.00 to  $<2.00$  and  $\geq 2.00$ ). Education level was categorized  
8 as high school not completed, high school completed, or high school graduate and  
9 some college or associated degrees pursued. Marital status was defined as  
10 married/living with a partner or widowed/divorced/separated/never married.  
11 Hypertension (HTN) (defined as systolic blood pressure  $\geq 140$  mmHg or diastolic  
12 blood pressure  $\geq 90$  mmHg) was determined using three blood pressure measurements  
13 at different times, an existing diagnosis, or evidence of an existing antihypertensive  
14 medication regimen. Diabetes mellitus (DM) was defined as either taking  
15 glucose-lowering therapies, HbA1c concentration of  $\geq 6.5\%$ , use of anti-diabetic  
16 medication, oral glucose tolerance test (OGTT)  $\geq 11.1$  mmol/L, fasting plasma glucose  
17  $\geq 7.0$  mmol/L, or random blood glucose  $\geq 11.1$  mmol/L. Smoking status was  
18 categorized as non-smokers (smoked  $<100$  cigarettes in a lifetime), former smoker  
19 (not currently smoking but have consumed  $\geq 100$  cigarettes previously), and current  
20 smoker (smoking at least  $\geq 100$  cigarettes every day or some days).  
21  
22  
23  
24  
25  
26  
27  
28  
29  
30  
31  
32  
33  
34  
35

### 36 **Statistical analysis**

37  
38 The main concern was whether AC is associated with depression after adjusting for  
39 other factors that may influence depression. Continuous variables are expressed as  
40 mean  $\pm$  standard deviation, and categorical variables are expressed as percentages.  
41 The weighted  $\chi^2$  test was used to compare categorical variables between groups, a  
42 one-way analysis of variance was used to compare normally distributed variables  
43 between groups, and the Kruskal-Wallis H test was used to compare variables with a  
44 skewed distribution between groups. Variance inflation factors were used to test  
45 multi-collinearity. Weighted multivariate logistic regression analysis evaluated the  
46 independent association between AC and depression. The participants were  
47 categorized into four groups based on AC:  $< 1.9310$ ,  $1.9310$  to  $< 2.6695$ ,  $2.6695$  to  $<$   
48  $3.6430$ , and  $\geq 3.6430$ . We used three levels of adjustment: Model 1 was adjusted for  
49 age, sex, and race/ethnicity; Model 2 was adjusted for the variables in Model 1 plus  
50  
51  
52  
53  
54  
55  
56  
57  
58  
59  
60

1  
2  
3  
4 BMI, PIR, educational level, and marital status; and Model 3 was adjusted for the  
5 variables in Model 2 plus HTN, DM, alcohol intake, smoking status, physical activity,  
6 and HbA1c. The imputation of missing data was conducted using the missForest R  
7 package. This random forest-based technique is highly computationally efficient for  
8 high-dimensional data of categorical and continuous predictors [22]. The missing  
9 values are presented in the table (Table S1).  
10  
11  
12  
13  
14

15 All analyses were performed using R software (The R Foundation, Vienna,  
16 Austria) and Empower (X&Y Solutions, Boston, MA, USA). Statistical significance  
17 was defined as a two-sided *P*-value <0.05.  
18  
19  
20

### 21 **Patient and public involvement**

22  
23  
24 None.  
25  
26  
27  
28

## 29 **RESULTS**

### 30 **Participant characteristics**

31  
32 In this study, 32,502 participants were included (Figure 1). Table 1 shows the  
33 characteristics of the participants according to their AC. There were statistically  
34 significant differences in age, sex, educational level, race/ethnicity, marital status,  
35 PIR, alcohol intake, smoking status, physical activity, BMI, HTN, DM, HbA1c, TC,  
36 and HDL cholesterol between the different AC groups (*P* <0.05).  
37  
38  
39  
40  
41

42 In addition to that, among those aged 20 years or older (n=30,441), 3,891 (9.79%)  
43 participants had missing AC values. The proportion of missing values for the different  
44 age groups is shown in Table S2. Fewer proportions of people between 40 and 69  
45 years old had missing AC values compared to those under 40 and those over 70 years.  
46  
47  
48  
49

50 We conducted a threshold saturation effect analysis on the data, and the results  
51 suggested a linear correlation between AC and depression (log-likelihood ratio  
52 (LLR)=0.051). The results of the threshold saturation effect are displayed in Table S3.  
53 Covariance is generally indicated if the tolerance (Tol) is less than 0.1 or the variance  
54 inflation factor (VIF) is greater than 10. Therefore, our results can initially ignore the  
55 problem of multicollinearity (Table S4).  
56  
57  
58  
59  
60

Participants in the lowest AC in Q1 (< 1.9310) were likely to be female, younger, more educated, married or cohabitating, non-Hispanic White, wealthier, less physically active, smoked less, consumed more alcohol, had no DM or HTN, higher HDL cholesterol levels, lower BMI, lower HbA1c levels, and TC levels.

In contrast, participants with the highest AC in Q4 (>3.6430) were likely to be male, middle-aged, more highly educated, non-Hispanic White, married or cohabitating, wealthier, consumed less alcohol, never smoked, inactive and obese, had HTN, lower HDL cholesterol levels, higher BMI, higher HbA1c and TC levels.

**Table 1.** Characteristics of the study population, using National Health and Nutrition Examination Survey data from 2005–2018 (N = 32,502), Weighted

| Characteristic                   | Overall              | Atherogenic coefficient quartiles† |                               |                            |                      | p-value |
|----------------------------------|----------------------|------------------------------------|-------------------------------|----------------------------|----------------------|---------|
|                                  |                      | Q1<br>(< 1.9310)                   | Q2<br>(1.9310 to <<br>2.6695) | Q3<br>(2.6695 to < 3.6430) | Q4<br>(≥ 3.6430)     |         |
| Sex (%)                          |                      |                                    |                               |                            |                      | <0.001  |
| Male                             | 48.78 (48.21,49.35)  | 32.75 (31.33, 34.21)               | 42.40 (40.95, 43.87)          | 54.04 (52.56,55.52)        | 66.36 (65.00,67.70)  |         |
| Female                           | 51.22 (50.65, 51.79) | 67.25 (65.79, 68.67)               | 57.60 (56.13, 59.05)          | 45.96 (44.48, 47.44)       | 33.64 (32.30, 35.00) |         |
| Age (%)                          |                      |                                    |                               |                            |                      | <0.001  |
| 20 to < 40                       | 35.93 (34.76, 37.12) | 40.78 (38.93, 42.66)               | 36.40 (34.73, 38.10)          | 33.15 (31.58, 34.76)       | 33.30 (31.69, 34.95) |         |
| 40 to <60                        | 37.75 (36.83, 38.67) | 29.54 (27.96, 31.18)               | 35.21 (33.59, 36.87)          | 40.86 (39.37,42.37)        | 45.58 (43.89, 47.29) |         |
| ≥60                              | 26.32 (25.26,27.40)  | 29.67 (28.04, 31.36)               | 28.39 (26.74, 30.09)          | 25.99 (24.53, 27.50)       | 21.12 (19.78,22.52)  |         |
| Educational level (%)            |                      |                                    |                               |                            |                      | <0.001  |
| <High school                     | 15.44 (14.36, 16.58) | 12.40 (11.24, 13.65)               | 14.04 (12.70, 15.49)          | 16.18 (14.78, 17.67)       | 19.24 (17.90, 20.65) |         |
| Completed high school            | 23.30 (22.35, 24.27) | 20.49 (19.12, 21.93)               | 22.16 (20.82, 23.56)          | 24.87 (23.59,26.20)        | 25.75 (24.17, 27.40) |         |
| >High school                     | 61.26 (59.57, 62.92) | 67.11 (65.08, 69.08)               | 63.80 (61.69, 65.86)          | 58.95 (56.99, 60.89)       | 55.02 (52.92, 57.09) |         |
| Race/ethnicity (%)               |                      |                                    |                               |                            |                      | <0.001  |
| Non-Hispanic White               | 68.41 (65.86, 70.86) | 69.02 (66.42, 71.51)               | 68.41 (65.87, 70.84)          | 68.23 (65.19, 71.72)       | 67.98 (65.01, 70.81) |         |
| Non-Hispanic Black               | 10.50 (9.27,11.88)   | 13.76 (12.07, 15.64)               | 11.32 (9.98, 12.81)           | 9.65 (8.42, 11.03)         | 7.20 (6.22, 8.32)    |         |
| Mexican American                 | 8.46 (7.22, 9.89)    | 6.06 (5.10, 7.18)                  | 7.53 (6.34, 8.93)             | 9.50 (8.04, 11.20)         | 10.82 (9.06, 12.86)  |         |
| Other Hispanic                   | 5.44 (4.65,6.35)     | 4.27 (3.54, 5.13)                  | 5.22 (4.40, 6.18)             | 5.83 (4.87, 6.97)          | 6.47 (5.42, 7.70)    |         |
| Other races/multiple<br>races    | 7.18 (6.50, 7.93)    | 6.89 (6.08, 7.81)                  | 7.52 (6.63, 8.51)             | 6.79 (5.96, 7.73)          | 7.54 (6.67, 8.50)    |         |
| Marital status (%)               |                      |                                    |                               |                            |                      | <0.001  |
| Married/Living with a<br>partner | 64.04 (62.84, 65.22) | 59.25 (57.29, 61.17)               | 62.92 (61.31, 64.54)          | 66.06 (64.48, 67.61)       | 68.04 (66.58,69.46)  |         |
| Widowed/Divorced/Sepa            | 35.96 (34.78, 37.16) | 40.75 (38.83, 42.71)               | 37.08 (35.49, 38.69)          | 33.94 (32.39, 35.52)       | 31.96 (30.54, 33.42) |         |



|                                           |                       |                      |                      |                      |                      |  |  |        |
|-------------------------------------------|-----------------------|----------------------|----------------------|----------------------|----------------------|--|--|--------|
| rated/Never married                       |                       |                      |                      |                      |                      |  |  |        |
| PIR (%)                                   |                       |                      |                      |                      |                      |  |  | <0.001 |
| < 1.00                                    | 13.58 (12.64, 14.57)  | 12.69 (11.51, 13.97) | 13.36 (12.18, 14.64) | 12.77 (11.70, 13.92) | 15.51 (14.13, 17.00) |  |  |        |
| 1.00 to <2.00                             | 20.31 (19.33, 21.32)  | 18.88 (17.52, 20.31) | 19.48 (18.36, 20.65) | 21.07 (19.63, 22.60) | 21.83 (20.18, 23.57) |  |  |        |
| ≥2.00                                     | 66.12 (64.45, 67.74)  | 68.44 (66.44, 70.37) | 67.16 (65.18, 69.08) | 66.15 (64.30, 67.96) | 62.66 (60.14, 65.12) |  |  |        |
| Alcohol intake (g/day)                    | 9.38 (8.90,9.87)      | 12.33 (11.43, 13.24) | 8.91 (8.22, 9.61)    | 7.84 (7.19, 8.49)    | 8.43 (7.62, 9.25)    |  |  | <0.001 |
| Smoking status (%)                        |                       |                      |                      |                      |                      |  |  | <0.001 |
| Non-smoker                                | 54.76 (53.63, 55.88)  | 58.23 (56.66, 59.78) | 56.97 (55.26, 58.66) | 54.94 (53.42, 56.45) | 48.79 (47.25, 50.33) |  |  |        |
| Former smoker                             | 25.13 (24.28, 26.00)  | 24.55 (23.30, 25.85) | 24.60 (23.23, 26.02) | 26.12 (24.65, 27.66) | 25.26 (24.00, 26.56) |  |  |        |
| Current smoker                            | 20.11 (19.24, 21.01)  | 17.22 (16.03, 18.48) | 18.44 (17.19, 19.75) | 18.94 (17.85, 20.08) | 25.95 (24.45,27.51)  |  |  |        |
| Physical activity (%)                     |                       |                      |                      |                      |                      |  |  | <0.001 |
| Inactive                                  | 45.81 (44.18, 47.45)  | 39.32 (36.97, 41.72) | 44.08 (41.77, 46.42) | 47.93 (46.10, 49.77) | 52.15 (50.11, 54.17) |  |  |        |
| Moderate                                  | 28.01 (26.94, 29.11)  | 27.48 (25.78, 29.25) | 28.01 (26.30, 29.78) | 29.11 (27.52, 30.76) | 27.43 (25.81, 29.11) |  |  |        |
| Vigorous                                  | 8.05 (7.55, 8.59)     | 8.86 (7.84, 9.99)    | 8.74 (7.74, 9.85)    | 7.25 (6.40, 8.20)    | 7.36 (6.37, 8.48)    |  |  |        |
| Both moderate and vigorous                | 18.13 (116.98, 19.34) | 24.34 (22.46, 26.33) | 19.17 (17.54, 20.93) | 15.71 (4.27, 17.25)  | 13.07 (11.83, 14.42) |  |  |        |
| BMI (kg/m <sup>2</sup> )                  | 29.10 (28.94,29.26)   | 26.12 (25.94, 26.30) | 28.70 (28.49, 28.90) | 30.28 (30.04, 30.52) | 31.38 (31.17, 31.59) |  |  | <0.001 |
| HTN (%)                                   | 38.20 (37.15, 39.25)  | 32.90 (31.30, 34.54) | 36.35 (34.76, 37.96) | 40.33 (38.70, 41.98) | 43.34 (41.78, 44.93) |  |  | <0.001 |
| DM (%)                                    | 14.38 (13.77, 15.02)  | 11.47 (10.59, 12.40) | 13.43 (12.48, 14.45) | 14.90 (13.73, 16.15) | 17.76 (16.69, 18.88) |  |  | <0.001 |
| CVD (%)                                   | 8.73 (8.25, 9.22)     | 9.42 (8.55, 10.37)   | 8.75 (7.97, 9.60)    | 8.44 (7.65, 9.30)    | 8.28 (7.45, 9.20)    |  |  | 0.207  |
| Depression (%)                            | 7.69 (7.24, 8.17)     | 6.48 (5.77, 7.26)    | 7.16 (6.30, 8.12)    | 8.27 (7.46, 9.16)    | 8.89 (8.16, 9.68)    |  |  | <0.001 |
| HbA1c (%)                                 | 5.61 (5.60, 5.63)     | 5.44 (5.42, 5.47)    | 5.55 (5.53, 5.57)    | 5.64 (5.61, 5.67)    | 5.82 (5.79, 5.86)    |  |  | <0.001 |
| TC(mmol/L)                                | 5.02 (5.00,5.05)      | 4.46 (4.43, 4.50)    | 4.77 (4.74, 4.80)    | 5.10 (5.07, 5.13)    | 5.77 (5.73, 5.80)    |  |  | <0.001 |
| HDL cholesterol (mmol/L)                  | 1.38 (1.37, 1.39)     | 1.82 (1.80, 1.84)    | 1.45 (1.44, 1.46)    | 1.24 (1.24, 1.25)    | 1.01 (1.00,1.02)     |  |  | <0.001 |
| Antidepressants (%)                       | 13.17 (12.52, 13.84)  | 12.65 (11.66, 13.70) | 13.76 (12.67, 14.93) | 13.25 (12.25, 14.33) | 13.01 (11.83, 14.28) |  |  | 0.477  |
| Anxiolytics, sedatives, and hypnotics (%) | 6.78 (6.33, 7.27)     | 7.29 (6.54, 8.12)    | 6.78 (6.07, 7.56)    | 6.31 (5.56, 7.15)    | 6.75 (5.93, 7.68)    |  |  | 0.339  |

For continuous variables: survey-weighted mean (95% CI), the *p*-value was by survey-weighted linear regression (svyglm). For categorical variables: survey-weighted percentage (95% CI), the *p*-value was by survey-weighted Chi-square test (svytable).

Abbreviations: DM, diabetes mellitus; CVD: cardiovascular disease; BMI, body mass index; HbA1c, glycosylated hemoglobin; TC, total cholesterol; HDL, high-density lipoprotein; HTN, hypertension; PIR, poverty-income ratio (ratio of family income to poverty threshold); SD, standard deviation

### Association between AC and depression

In the fully adjusted model, we observed a linear relationship between AC and depression (Figure 2). The results of the weighted multivariate logistic regression analysis are presented in Table 2. AC was positively correlated with depression in the crude model (odds ratio [OR]= 1.08, 95% confidence interval [CI]:1.06-1.11, *P* <0.001). A significant association between AC and depression was detected in



Models 1-3 after adjusting for confounders. In Model 3, all variables were adjusted; for every 1 unit increase in AC, the incidence of depression increased by 3% (OR = 1.03, 95% CI = 1.00–1.06,  $P = 0.039$ ).

**Table 2.** Associations of the atherogenic coefficient with depression (n = 32,502), Weighted.

|                              | Crude Modela        |                 | Model 1b            |                 | Model 2c            |                 | Model 3d            |                 |
|------------------------------|---------------------|-----------------|---------------------|-----------------|---------------------|-----------------|---------------------|-----------------|
|                              | OR (95% CI)         | <i>p</i> -value | OR (95% CI)         | <i>p</i> -value | OR (95% CI)         | <i>p</i> -value | OR (95% CI)         | <i>p</i> -value |
| Per 1 increase               | 1.08<br>(1.06,1.11) | <0.001          | 1.13<br>(1.10,1.16) | <0.001          | 1.07<br>(1.04,1.10) | <0.001          | 1.03<br>(1.00,1.06) | 0.039           |
| Quartiles                    |                     |                 |                     |                 |                     |                 |                     |                 |
| Q1 (AC: < 1.9310 )           | Reference<br>[1]    |                 | Reference<br>[1]    |                 | Reference<br>[1]    |                 | Reference<br>[1]    |                 |
| Q2 (AC: 1.9310 to < 2.6695 ) | 1.11<br>(0.96,1.30) | 0.166           | 1.18<br>(1.01,1.38) | 0.040           | 1.07<br>(0.91,1.25) | 0.431           | 1.04<br>(0.89,1.22) | 0.589           |
| Q3 (AC: 2.6695 to < 3.6430 ) | 1.30<br>(1.11,1.53) | 0.001           | 1.48<br>(1.26,1.74) | <0.001          | 1.24<br>(1.07,1.45) | 0.006           | 1.18<br>(1.02,1.38) | 0.034           |
| Q4 (AC: ≥ 3.6430 )           | 1.41<br>(1.22,1.62) | <0.001          | 1.75<br>(1.50,2.03) | <0.001          | 1.32<br>(1.14,1.54) | <0.001          | 1.15<br>(0.99,1.33) | 0.074           |
| <i>p</i> for trend           | <0.001              |                 | <0.001              |                 | <0.001              |                 | 0.040               |                 |

Abbreviations: AC, atherogenic coefficient.

aModel 1: Adjusted for age, sex, and race/ethnicity.

bModel 2: Adjusted for the variables in Model 1 plus body mass index, poverty-income ratio, educational level, and marital status.

cModel 3: Adjusted for the variables in Model 2 plus hypertension, diabetes mellitus, alcohol intake, smoking status, physical activity, and glycosylated hemoglobin.

After adjusting for age, sex, race/ethnicity, BMI, PIR, educational level, marital status, HTN, DM, alcohol intake, smoking status, physical activity, and HbA1c compared with participants in the first quartile (AC < 1.9310), the second group (1.9310 to < 2.6695, OR = 1.04, 95% CI = 0.89– 1.22,  $P = 0.589$ ), the third group (2.6695 to < 3.6430, OR = 1.18, 95% CI = 1.02– 1.38,  $P = 0.034$ ), and the fourth group ( $\geq 3.6430$ , OR = 1.15, 95% CI = 0.99– 1.33,  $P = 0.074$ ) had an increased prevalence of depression ( $P$  for trend was significant in all the models).

Furthermore, regarding the interaction between sex and the relationship between AC and depression, the relationship was more significant in females (OR = 1.07, 95% CI = 1.02–1.12, *P* for interaction = 0.027) (Table 3).

**Table 3.** Subgroup analysis of the effect of the atherogenic coefficient on depression (n = 32502), Weight.

| Subgroup                           | Number of participants | OR (95% CI)       | <i>P</i> for interaction |
|------------------------------------|------------------------|-------------------|--------------------------|
| Sex, n (%)                         |                        |                   | 0.027                    |
| Male                               | 15954                  | 1.05 (1.01, 1.10) |                          |
| Female                             | 16548                  | 1.07 (1.02, 1.12) |                          |
| Age, n (%)                         |                        |                   | 0.375                    |
| 20 – < 40                          | 10857                  | 1.07 (1.02, 1.12) |                          |
| 40 – < 60                          | 10632                  | 1.04 (0.99, 1.09) |                          |
| ≥ 60                               | 11013                  | 1.04 (0.97, 1.11) |                          |
| Race/ethnicity, n (%)              |                        |                   | 0.196                    |
| Non-Hispanic White                 | 14112                  | 1.03 (0.99, 1.08) |                          |
| Non-Hispanic Black                 | 6713                   | 1.06 (0.98, 1.15) |                          |
| Mexican American                   | 5174                   | 1.05 (0.97, 1.14) |                          |
| Other Hispanic                     | 3109                   | 1.12 (1.06, 1.19) |                          |
| Other race/multiple races          | 3394                   | 1.10 (0.96, 1.26) |                          |
| BMI, kg/m <sup>2</sup> , mean (SD) |                        |                   | 0.212                    |
| Low                                | 10729                  | 1.08 (1.00, 1.17) |                          |
| Middle                             | 10733                  | 1.06 (1.01, 1.12) |                          |
| High                               | 10743                  | 1.03 (0.99, 1.08) |                          |
| Hypertension, n (%)                |                        |                   | 0.949                    |
| Yes                                | 13940                  | 1.04 (1.00, 1.08) |                          |
| No                                 | 18562                  | 1.06 (1.01, 1.12) |                          |
| DM, n (%)                          |                        |                   | 0.670                    |
| Yes                                | 6152                   | 1.03 (0.98, 1.08) |                          |
| No                                 | 25761                  | 1.07 (1.03, 1.11) |                          |

Abbreviations: BMI, body mass index (calculated as weight, in kilograms, divided by the square of height, in meters); DM, diabetes mellitus; HTN, hypertension

## DISCUSSION

This cross-sectional study showed an association between AC and depression in adults in the United States. After adjusting for covariates, a positive linear relationship was found between AC and depression.

1  
2  
3  
4 The details of the mechanism explaining the relationship between AC and  
5 depression need to be further explored, and there may be several possible  
6 explanations. Lipids and the immune system interact with one another and have a  
7 regulatory effect on each other. Dysregulated inflammation promotes susceptibility to  
8 depression [23]. Studies have shown that inflammatory cytokines produced in the  
9 periphery enter the cells of the central nervous system and can affect  
10 neurotransmitters and neural circuits, producing behavioral symptoms of depression  
11 [24]. When T lymphocytes are activated, they not only participate in immune  
12 inflammation but also directly contribute to the development of depression when  
13 functionally impaired [25,26]. Lipid peroxidation and oxidation-specific epitopes are  
14 formed, and the levels of antioxidants such as glutathione, glutathione peroxidase, and  
15 coenzyme Q10 are reduced, resulting in or aggravating oxidative stress [27,28].

16  
17  
18  
19  
20  
21  
22  
23  
24  
25  
26  
27  
28  
29  
30  
31  
32  
33  
34  
35  
36  
37  
38  
39  
40  
41  
42  
43  
44  
45  
46  
47  
48  
49  
50  
51  
52  
53  
54  
55  
56  
57  
58  
59  
60  
When lipids are abnormal, the inflammatory, oxidative, and nitrosative (IO&NS) pathway is further activated [29]. At this time, the increase in binding globin and high-sensitivity C-reactive protein (CRP) is accompanied by a significant increase in interleukin-6 (IL-6), tumor necrosis factor- $\alpha$ , interferon- $\gamma$ , other pro-inflammatory cytokines, and immune inflammation [30]. These factors lead to defects in serotonin and melatonin through the kynurenine pathway, often considered one of the main causes of depression [31]. Activation of the IO&NS pathway leads to mitochondrial and subsequent cellular dysfunction [32]. Previous studies have linked mitochondrial dysfunction in various brain regions to depression [33].

Statins have also been shown to have antidepressant effects when co-prescribed with antidepressants [34]. Lowering the AC index of patients with mood disorders improves CVD outcomes [35]. CVD is a heart and blood vessel disease characterized by myocardial infarction, angina pectoris, heart failure, heart attack, and stroke [36]. Longer exposure to depression is associated with significantly increased CVD risk [37]. Factors contributing to the link between depression and cardiac outcome may include alterations in the autonomic nervous system, platelet receptors and function, coagulopathic factors, pro-inflammatory cytokines, endothelial function, neurohormonal factors, and genetic linkages [38]. At the same

1  
2  
3  
4 time, patient compliance with antidepressant treatment is relatively poor [39].  
5  
6 Atherosclerosis is a chronic vascular inflammatory disease associated with oxidative  
7  
8 stress and endothelial dysfunction [40]. Atherosclerosis is the underlying cause of  
9  
10 CVD, and AC is a major indicator of atherosclerosis [41]. Our results suggest that AC  
11  
12 may play a role in depression. AC may indicate the relationship between CVD and  
13  
14 depression and a potential target and marker for treating depression or depression  
15  
16 combined with CVD. The relevant mechanisms remain to be explored further.

17  
18 Our study found increased odds of depression with increased AC in adults,  
19  
20 demonstrating that controlling AC may be beneficial for preventing depression. Sex  
21  
22 may affect this relationship. In the subgroup analysis (Table 3), we found a stronger  
23  
24 relationship between AC and depression in females. The synergistic effect of estrogen  
25  
26 on cognitive and emotional functions may underlie the association between ovarian  
27  
28 hormone fluctuations and depression in females [42]. The induction of indoleamine 2,  
29  
30 3-dioxygenase, and deleterious effects of tryptophan catabolizing metabolites  
31  
32 (TRYCATs) play a role in the pathophysiology of depression. Activation of IDO  
33  
34 decreases plasma tryptophan levels and increases TRYCAT synthesis in depressed  
35  
36 individuals. Females showed more IDO activation and TRYCAT production after  
37  
38 immune challenge than males [43]. Therefore, this sex difference in immune  
39  
40 dysregulation may contribute to higher levels of anxiety and depression experienced  
41  
42 by females.

43  
44 This study has some limitations. First, this was a cross-sectional study;  
45  
46 therefore, we could not determine a causal relationship between AC and depression.  
47  
48 Second, the PHQ-9 is a proven, simple, and effective tool for identifying the severity  
49  
50 of depressive symptoms, but it is not a diagnostic tool for MDD. Third, the  
51  
52 relationship we studied may have been influenced by other confounding factors,  
53  
54 which we have not adjusted. Fourth, the differences in demographics and population  
55  
56 characteristics in the United States may limit the generalizability of the findings to  
57  
58 other countries or regions. Fifth, AC is associated with both depression and CVD,  
59  
60 which may potentially affect the nervous system and mental health. At the same time,  
there are also uncontrollable variables such as lifestyle and regional culture. Finally,

1  
2  
3  
4 although collinearity statistics did not find any significant collinearity, relationships  
5 that are beyond statistical  $p$ -values may exist.  
6  
7  
8

## 9 **CONCLUSIONS**

10 Our research shows that higher AC levels in American adults are positively related to  
11 a higher prevalence of depression. Further studies are required to explore the  
12 underlying mechanisms and potential benefits of controlling AC levels in patients  
13 with depression.  
14  
15  
16  
17  
18  
19  
20

21 **Funding:** This work was supported by the Shandong Province Traditional Chinese Medicine  
22 Science and Technology project key project Z-2023019.  
23

24 **Competing Interests:** This research received no specific grant from any funding agency in  
25 the public, commercial, or not-for-profit sectors.  
26  
27

28 **Author Contributions:** Conceptualization, L Zhang, J Yin; methodology, L Zhang; software,  
29 J Yin; validation, H Sun, Y Liu and J Yang; formal analysis, L Zhang, J Yin, and H Sun;  
30 investigation, L Zhang; resources, L Zhang; data curation, H Sun; writing—original draft  
31 preparation, L Zhang; writing—review and editing, Y Liu and J Yang; visualization, J Yin;  
32 supervision, Y Liu and J Yang; project administration, L Zhang. All authors have read and  
33 agreed to the published version of the manuscript.  
34  
35  
36  
37  
38  
39

40 **Acknowledgments:** Thanks to the acupuncture-medicine team. Thanks to Prof. Liu and Prof.  
41 Yang for their careful teaching. Thanks to our colleagues for their help. Thanks to all who  
42 contributed to the manuscript.  
43  
44  
45

46 **Data Sharing Statement:** The original contributions presented in the study are included in  
47 the article/supplementary material, further inquiries can be directed to the corresponding  
48 author.  
49  
50

51 **Ethics Statement:** The National Center for Health Statistics (NCHS) Research Ethics Review  
52 Board (ERB) authorized the NHANES study protocols. The data for this study were obtained  
53 from the NHANES database, no one was directly involved, and no additional ethical  
54 guidelines were required.  
55  
56  
57  
58  
59  
60

## References

- [1]McCarron RM, Shapiro B, Rawles J, et al. Depression. *Ann Intern Med.* 2021;174:ITC65–ITC80.
- [2]Malhi GS, Mann JJ. Depression. *Lancet.* 2018;392:2299–2312.
- [3]Stringaris A. Editorial: what is depression? *J Child Psychol Psychiatry.* 2017;58:1287–1289.
- [4]Reeder N, Tolar-Peterson T, Bailey RH, et al. Food Insecurity and Depression among US Adults: NHANES 2005-2016. *Nutrients.* 2022;14:3081.
- [5]Meng R, Yu C, Liu N, et al. Association of Depression With All-Cause and Cardiovascular Disease Mortality Among Adults in China. *JAMA Netw Open.* 2020;3:e1921043.
- [6]Hao Y, Ge H, Sun M, et al. Selecting an appropriate animal model of depression. *Int J Mol Sci.* 2019;20:4827.
- [7]Edinoff AN, Akuly HA, Hanna TA, et al. Selective Serotonin Reuptake Inhibitors and Adverse Effects: A Narrative Review. *Neurol Int.* 2021;13:387-401.
- [8]Andrews B, Klein B, Van Nguyen H, et al. Efficacy of a Digital Mental Health Biopsychosocial Transdiagnostic Intervention With or Without Therapist Assistance for Adults With Anxiety and Depression: Adaptive Randomized Controlled Trial. *J Med Internet Res.* 2023;25:e45135.
- [9]Milaneschi Y, Simmons WK, van Rossum EFC, et al. Depression and obesity: evidence of shared biological mechanisms. *Mol Psychiatry.* 2019;24:18–33.
- [10]Able AA, Richard AJ, Stephens JM. TNF $\alpha$  Effects on Adipocytes Are Influenced by the Presence of Lysine Methyltransferases, G9a (EHMT2) and GLP (EHMT1). *Biology (Basel).* 2023;12:674.
- [11]Otte C, Gold SM, Penninx BW, et al. Major depressive disorder. *Nat Rev Dis Primers.* 2016;2:16065.
- [12]Beverly JK, Budoff MJ. Atherosclerosis: pathophysiology of insulin resistance, hyperglycemia, hyperlipidemia, and inflammation. *J Diabetes.* 2020;12:102–104.
- [13]Mahdavi-Roshan M, Shoaibinobarian N, Noormohammadi M, et al. Inflammatory Markers and Atherogenic Coefficient: Early Markers of Metabolic Syndrome. *Int J Endocrinol Metab.* 2022;20:e127445.

- 1  
2  
3 [14]Nunes SO, Piccoli de Melo LG, Pizzo de Castro MR, et al. Atherogenic index of  
4 plasma and atherogenic coefficient are increased in major depression and bipolar  
5 disorder, especially when comorbid with tobacco use disorder. *J Affect Disord.*  
6 2015;172:55–62.  
7  
8  
9  
10 [15]Tao SH, Ren XQ, Zhang LJ, et al. Association between common cardiovascular  
11 drugs and depression. *Chin Med J (Engl).* 2021;134:2656–2665.  
12  
13 [16]Walker AJ, Kim Y, Borissiouk I, et al. Statins: neurobiological underpinnings and  
14 mechanisms in mood disorders. *Neurosci Biobehav Rev.* 2021;128:693–708.  
15  
16 [17]Fain JA. NHANES. *Diabetes Educ.* 2017;43:151.  
17  
18 [18]Patel JS, Oh Y, Rand KL, et al. Measurement invariance of the patient health  
19 questionnaire-9 (PHQ-9) depression screener in U.S. adults across sex,  
20 race/ethnicity, and education level: NHANES 2005-2016. *Depress Anxiety.*  
21 2019;36:813-823.  
22  
23 [19]Levis B, Benedetti A, Thombs BD, et al. Accuracy of Patient Health  
24 Questionnaire-9 (PHQ-9) for screening to detect major depression: individual  
25 participant data meta-analysis. *BMJ.* 2019;365:11476.  
26  
27 [20]Brooks JM, Titus AJ, Bruce ML, et al. Depression and handgrip strength among  
28 U.S. adults aged 60 years and older from NHANES 2011-2014. *J Nutr Health*  
29 *Aging.* 2018;22:938–943.  
30  
31 [21]Levis B, Benedetti A, Thombs BD; DEPRESSion Screening Data (DEPRESSD)  
32 Collaboration. Accuracy of Patient Health Questionnaire-9 (PHQ-9) for screening  
33 to detect major depression: individual participant data meta-analysis. *BMJ.*  
34 2019;365:11476.  
35  
36 [22]Stekhoven DJ, Bühlmann P. MissForest—non-parametric missing value  
37 imputation for mixed-type data. *Bioinformatics.* 2012;28:112–118.  
38  
39 [23]Beurel E, Toups M, Nemeroff CB. The bidirectional relationship of depression  
40 and inflammation: double trouble. *Neuron.* 2020;107:234–256.  
41  
42 [24]Capuron L, Lasselin J, Castanon N. Role of adiposity-driven inflammation in  
43 depressive morbidity. *Neuropsychopharmacology.* 2017;42:115–128.  
44  
45 [25]Haapakoski R, Ebmeier KP, Alenius H, et al. Innate and adaptive immunity in the  
46 development of depression: an update on current knowledge and technological  
47 advances. *Prog Neuropsychopharmacol Biol Psychiatry.* 2016;66:63–72.  
48  
49 [26]Miller AH. Depression and immunity: a role for T cells? *Brain Behav Immun.*  
50 2010;24:1–8.  
51  
52  
53  
54  
55  
56  
57  
58  
59  
60



- 1  
2  
3 [27]Bartolini Gritti B, Binder CJ. Oxidation-specific epitopes are major targets of  
4 innate immunity in atherothrombosis. *Hamostaseologie*. 2016;36:89–96.  
5  
6 [28]Maes M, Mihaylova I, Kubera M, et al. Increased plasma peroxides and serum  
7 oxidized low density lipoprotein antibodies in major depression: markers that  
8 further explain the higher incidence of neurodegeneration and coronary artery  
9 disease. *J Affect Disord*. 2010;125:287–94.  
10  
11 [29]Morris G, Puri BK, Walker AJ, et al. Shared pathways for neuroprogression and  
12 somatoprogession in neuropsychiatric disorders. *Neurosci Biobehav Rev*.  
13 2019;107:862–882.  
14  
15 [30]Maes M, Ruckoanich P, Chang YS, et al. Multiple aberrations in shared  
16 inflammatory and oxidative & nitrosative stress (IO&NS) pathways explain the  
17 co-association of depression and cardiovascular disorder (CVD), and the  
18 increased risk for CVD and due mortality in depressed patients. *Prog*  
19 *Neuropsychopharmacol Biol Psychiatry*. 2011;35:769–783.  
20  
21 [31]Gałecki P, Talarowska M. Inflammatory theory of depression. *Psychiatr Pol*.  
22 2018;52:437–447.  
23  
24 [32]Mezzaroba L, Alfieri DF, Colado Simão AN, et al. The role of zinc, copper,  
25 manganese and iron in neurodegenerative diseases. *Neurotoxicology*.  
26 2019;74:230–241.  
27  
28 [33]Bansal Y, Kuhad A. Mitochondrial dysfunction in depression. *Curr*  
29 *Neuropharmacol*. 2016;4:610–618.  
30  
31 [34]Singh D, Lippmann S. Can statins diminish depression? *Prim Care Companion*  
32 *CNS Disord*. 2018;20:17br02169.  
33  
34 [35]Zhang Y, Chen Y, Ma L. Depression and cardiovascular disease in elderly:  
35 current understanding. *J Clin Neurosci*. 2018;47:1–5.  
36  
37 [36]Xu C, Liang J, Xu S, et al. Increased serum levels of aldehydes are associated  
38 with cardiovascular disease and cardiovascular risk factors in adults. *J Hazard*  
39 *Mater*. 2020;400:123134.  
40  
41 [37]Zhang Y, Li X, Chan VKY, et al. Depression duration and risk of incident  
42 cardiovascular disease: A population-based six-year cohort study. *J Affect Disord*.  
43 2022;305:188-195.  
44  
45 [38]de Jonge P, Rosmalen JG, Kema IP, et al. Psychophysiological biomarkers  
46 explaining the association between depression and prognosis in coronary artery  
47  
48  
49  
50  
51  
52  
53  
54  
55  
56  
57  
58  
59  
60



1  
2  
3 patients: a critical review of the literature. *Neurosci Biobehav Rev.* 2010;35:84–  
4 90.

5  
6 [39]Shrestha Manandhar J , Shrestha R , Basnet N , et al. Study of Adherence Pattern  
7 of Antidepressants in Patients with Depression. *Kathmandu Univ Med J (KUMJ).*  
8 2017;15:3-9.

9  
10 [40]Marchio P, Guerra-Ojeda S, Vila JM, et al. Targeting early atherosclerosis: a  
11 focus on oxidative stress and inflammation. *Oxid Med Cell Longev.*  
12 2019;2019:8563845.

13  
14 [41]Nitsa A, Toutouza M, Machairas N, et al. Vitamin D in cardiovascular disease. In  
15 *Vivo.* 2018;32:977–981.

16  
17 [42]Albert KM, Newhouse PA. Estrogen, stress, and depression: cognitive and  
18 biological interactions. *Annu Rev Clin Psychol.* 2019;15:399–423.

19  
20 [43]Maes M, Leonard BE, Myint AM, et al. The new ‘5-HT’ hypothesis of depression:  
21 cell-mediated immune activation induces indoleamine 2,3-dioxygenase, which  
22 leads to lower plasma tryptophan and an increased synthesis of detrimental  
23 tryptophan catabolites (TRYCATs), both of which contribute to the onset of  
24 depression. *Prog Neuropsychopharmacol Biol Psychiatry.* 2011;35:702–721.

## 25 26 27 28 29 30 31 32 33 34 35 **FIGURE LEGENDS**

36  
37 **Figure 1.** Flowchart for inclusion of study participants.

38  
39 **Figure 2.** Association between AC and depression in US adults (n=4759). The black  
40 vertical line on the horizontal axis represents the AC distribution, the red line  
41 represents the best fit, and the difference between the dashed lines represents the 95%  
42 confidence interval. The data was adjusted for age, sex, race/ethnicity, body mass  
43 index, poverty-income ratio, educational level, marital status, hypertension, diabetes  
44 mellitus, alcohol intake, smoking status, physical activity, and glycosylated  
45 hemoglobin.  
46  
47  
48  
49  
50  
51  
52  
53  
54  
55  
56  
57  
58  
59  
60

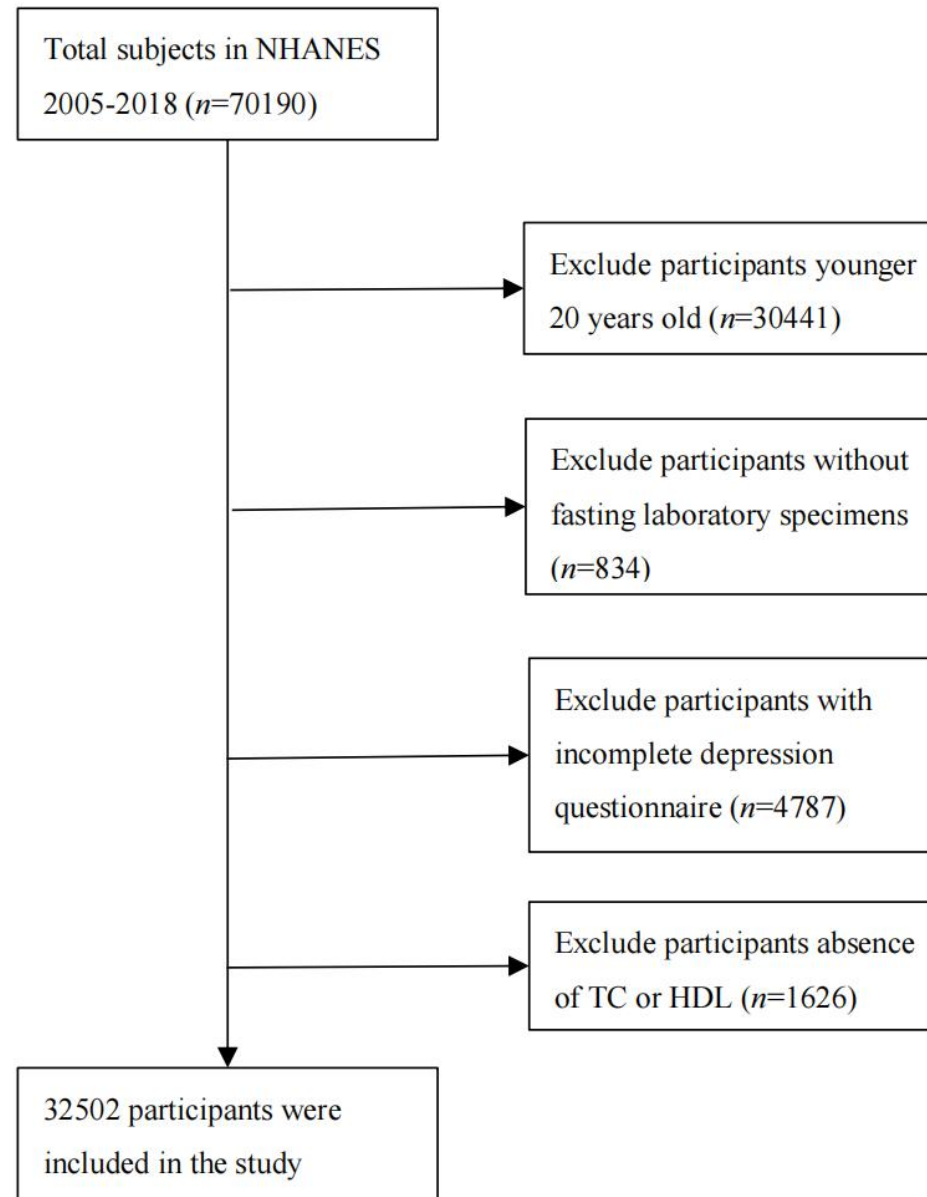

Figure 1. Flowchart for inclusion of study participants.

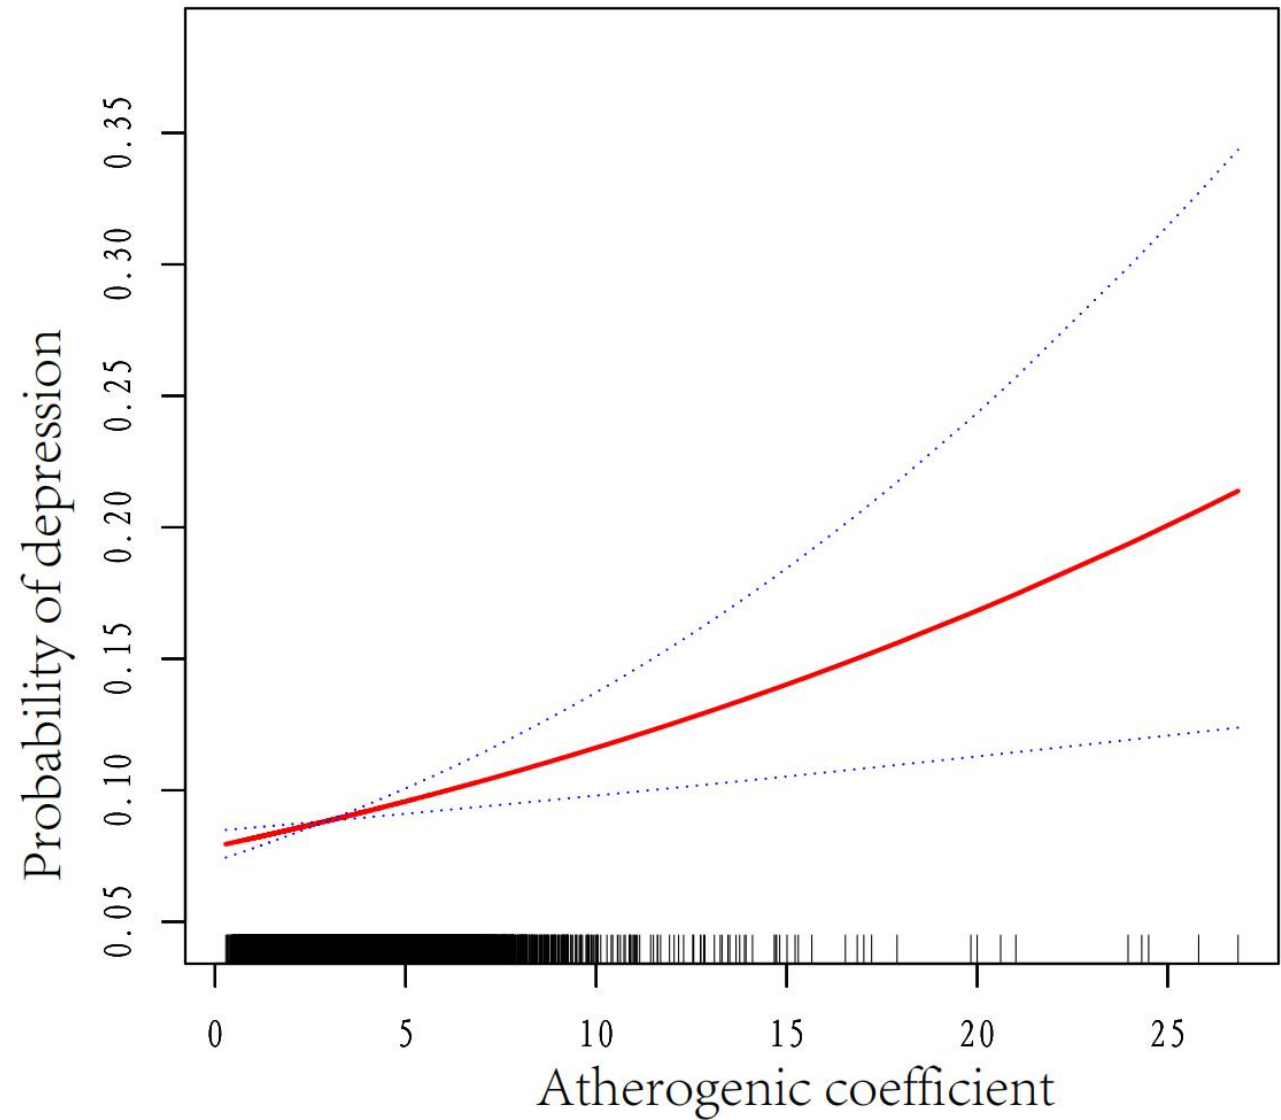

**Table S1.** Missing covariates of study participants (n = 32502)

| Variable                | Number of patients (% missing) |
|-------------------------|--------------------------------|
| Age                     | 0 (0%)                         |
| Sex                     | 0 (0%)                         |
| Race/ethnicity          | 0 (0%)                         |
| Educational level       | 23 (0.07%)                     |
| Marital status          | 16 (0.04%)                     |
| Poverty-income ratio    | 2767 (8.51%)                   |
| Body mass index         | 297 (0.91%)                    |
| Alcohol intake          | 4661 (14.34%)                  |
| Smoking status          | 17 (0.05%)                     |
| Physical activity       | 4102 (12.62%)                  |
| Hypertension            | 0 (0%)                         |
| Diabetes mellitus       | 589 (1.81%)                    |
| Glycosylated hemoglobin | 58 (0.18%)                     |

**Table S2.** Absence of atherogenic coefficient in adults

| Age (y) | Missing number (n) | Total number (n) | Proportion (%) |
|---------|--------------------|------------------|----------------|
| 20-29   | 729                | 6029             | 12.09          |
| 30-39   | 665                | 6044             | 11.00          |
| 40-49   | 527                | 6060             | 8.70           |
| 50-59   | 524                | 5691             | 9.21           |
| 60-69   | 575                | 5974             | 9.63           |
| 70-79   | 425                | 3730             | 11.39          |
| ≥80     | 446                | 2330             | 19.14          |

**Table S3.** Threshold effect analysis for association of atherogenic coefficient with depression

| Outcomes               | Depression       | P-value |
|------------------------|------------------|---------|
| Model 1, $\beta$ (95%) |                  |         |
| Linear effort model    | 1.04(1.02,1.07)  | 0.002   |
| Model 2, $\beta$ (95%) |                  |         |
| Infection point (K)    | 1.2              |         |
| K <1.2                 | 0.54 (0.29,1.03) | 0.059   |
| 1.2 >K                 | 1.05 (1.02,1.08) | <0.001  |
| LLR                    | 0.051            |         |

**Table S4.** Results of collinearity detection

| Mode |             | Unstandardized |                | Standardized | t      | Significance | Collinearity |       |
|------|-------------|----------------|----------------|--------------|--------|--------------|--------------|-------|
|      |             | Coefficients   |                |              |        |              | Statistics   |       |
| 1    |             | B              | Standard Error |              |        |              | Tolerance    | VIF   |
| 1    | Constant    | -0.067         | 0.01           |              | -6.668 | 0            |              |       |
|      | AC          | 0.002          | 0.002          | 0.01         | 1.089  | 0.276        | 0.153        | 6.524 |
|      | HDL         | -0.002         | 0.006          | -0.003       | -0.349 | 0.727        | 0.193        | 5.177 |
|      | cholesterol |                |                |              |        |              |              |       |
|      | TC          | -0.001         | 0.002          | -0.002       | -0.312 | 0.755        | 0.269        | 3.723 |
|      | HbA1c       | 0.001          | 0.001          | 0.004        | 0.973  | 0.33         | 0.936        | 1.068 |

Dependent Variable: Depression.

Abbreviations: AC, atherogenic coefficient; HDL, high-density lipoprotein; TC, total cholesterol; HbA1c, glycosylated hemoglobin.

**STROBE 2007 (v4) Statement—Checklist of items that should be included in reports of *cross-sectional studies***

| Section/Topic                | Item # | Recommendation                                                                                                                                                                       | Reported on page # |
|------------------------------|--------|--------------------------------------------------------------------------------------------------------------------------------------------------------------------------------------|--------------------|
| <b>Title and abstract</b>    | 1      | (a) Indicate the study's design with a commonly used term in the title or the abstract                                                                                               | 2                  |
|                              |        | (b) Provide in the abstract an informative and balanced summary of what was done and what was found                                                                                  | 2                  |
| <b>Introduction</b>          |        |                                                                                                                                                                                      |                    |
| Background/rationale         | 2      | Explain the scientific background and rationale for the investigation being reported                                                                                                 | 3                  |
| Objectives                   | 3      | State specific objectives, including any prespecified hypotheses                                                                                                                     | 4                  |
| <b>Methods</b>               |        |                                                                                                                                                                                      |                    |
| Study design                 | 4      | Present key elements of study design early in the paper                                                                                                                              |                    |
| Setting                      | 5      | Describe the setting, locations, and relevant dates, including periods of recruitment, exposure, follow-up, and data collection                                                      |                    |
| Participants                 | 6      | (a) Give the eligibility criteria, and the sources and methods of selection of participants                                                                                          | 4                  |
| Variables                    | 7      | Clearly define all outcomes, exposures, predictors, potential confounders, and effect modifiers. Give diagnostic criteria, if applicable                                             | 5-6                |
| Data sources/<br>measurement | 8*     | For each variable of interest, give sources of data and details of methods of assessment (measurement). Describe comparability of assessment methods if there is more than one group | 5-6                |
| Bias                         | 9      | Describe any efforts to address potential sources of bias                                                                                                                            | 6-7                |
| Study size                   | 10     | Explain how the study size was arrived at                                                                                                                                            | 4                  |
| Quantitative variables       | 11     | Explain how quantitative variables were handled in the analyses. If applicable, describe which groupings were chosen and why                                                         | 5-6                |
| Statistical methods          | 12     | (a) Describe all statistical methods, including those used to control for confounding                                                                                                | 6-7                |
|                              |        | (b) Describe any methods used to examine subgroups and interactions                                                                                                                  | 5                  |
|                              |        | (c) Explain how missing data were addressed                                                                                                                                          | 7                  |
|                              |        | (d) If applicable, describe analytical methods taking account of sampling strategy                                                                                                   |                    |
|                              |        | (e) Describe any sensitivity analyses                                                                                                                                                |                    |
| <b>Results</b>               |        |                                                                                                                                                                                      |                    |

|                          |     |                                                                                                                                                                                                                                                                                                                                                                                                               |       |
|--------------------------|-----|---------------------------------------------------------------------------------------------------------------------------------------------------------------------------------------------------------------------------------------------------------------------------------------------------------------------------------------------------------------------------------------------------------------|-------|
| Participants             | 13* | (a) Report numbers of individuals at each stage of study—eg numbers potentially eligible, examined for eligibility, confirmed eligible, included in the study, completing follow-up, and analysed<br>(b) Give reasons for non-participation at each stage<br>(c) Consider use of a flow diagram                                                                                                               | 7     |
| Descriptive data         | 14* | (a) Give characteristics of study participants (eg demographic, clinical, social) and information on exposures and potential confounders<br>(b) Indicate number of participants with missing data for each variable of interest                                                                                                                                                                               | 4     |
| Outcome data             | 15* | Report numbers of outcome events or summary measures                                                                                                                                                                                                                                                                                                                                                          | 7     |
| Main results             | 16  | (a) Give unadjusted estimates and, if applicable, confounder-adjusted estimates and their precision (eg, 95% confidence interval). Make clear which confounders were adjusted for and why they were included<br>(b) Report category boundaries when continuous variables were categorized<br>(c) If relevant, consider translating estimates of relative risk into absolute risk for a meaningful time period | 5-6   |
| Other analyses           | 17  | Report other analyses done—eg analyses of subgroups and interactions, and sensitivity analyses                                                                                                                                                                                                                                                                                                                | 12    |
| <b>Discussion</b>        |     |                                                                                                                                                                                                                                                                                                                                                                                                               |       |
| Key results              | 18  | Summarise key results with reference to study objectives                                                                                                                                                                                                                                                                                                                                                      | 13-14 |
| Limitations              | 19  | Discuss limitations of the study, taking into account sources of potential bias or imprecision. Discuss both direction and magnitude of any potential bias                                                                                                                                                                                                                                                    | 15    |
| Interpretation           | 20  | Give a cautious overall interpretation of results considering objectives, limitations, multiplicity of analyses, results from similar studies, and other relevant evidence                                                                                                                                                                                                                                    |       |
| Generalisability         | 21  | Discuss the generalisability (external validity) of the study results                                                                                                                                                                                                                                                                                                                                         | 15    |
| <b>Other information</b> |     |                                                                                                                                                                                                                                                                                                                                                                                                               |       |
| Funding                  | 22  | Give the source of funding and the role of the funders for the present study and, if applicable, for the original study on which the present article is based                                                                                                                                                                                                                                                 | 15    |

\*Give information separately for cases and controls in case-control studies and, if applicable, for exposed and unexposed groups in cohort and cross-sectional studies.

**Note:** An Explanation and Elaboration article discusses each checklist item and gives methodological background and published examples of transparent reporting. The STROBE checklist is best used in conjunction with this article (freely available on the Web sites of PLoS Medicine at <http://www.plosmedicine.org/>, Annals of Internal Medicine at <http://www.annals.org/>, and Epidemiology at <http://www.epidem.com/>). Information on the STROBE Initiative is available at [www.strobe-statement.org](http://www.strobe-statement.org).
