# Supplementary material for: Association between atherogenic coefficient and depression in US adults: a cross-sectional study with data from National Health and Nutrition Examination Survey 2005–2018
Source: HighWire-hosted journal article supplement (doi:10.1136/bmjopen-2023-074001), 2023-10-01
Supplement: bmjopen-2023-074001supp001_data_supplement.pdf [file bmjopen-2023-074001supp001_data_supplement.pdf]

**Table S1.** Missing covariates of study participants (n = 32502)

| Variable                | Number of patients (% missing) |
|-------------------------|--------------------------------|
| Age                     | 0 (0%)                         |
| Sex                     | 0 (0%)                         |
| Race/ethnicity          | 0 (0%)                         |
| Educational level       | 23 (0.07%)                     |
| Marital status          | 16 (0.04%)                     |
| Poverty-income ratio    | 2767 (8.51%)                   |
| Body mass index         | 297 (0.91%)                    |
| Alcohol intake          | 4661 (14.34%)                  |
| Smoking status          | 17 (0.05%)                     |
| Physical activity       | 4102 (12.62%)                  |
| Hypertension            | 0 (0%)                         |
| Diabetes mellitus       | 589 (1.81%)                    |
| Glycosylated hemoglobin | 58 (0.18%)                     |

**Table S2.** Absence of atherogenic coefficient in adults

| Age (y) | Missing number (n) | Total number (n) | Proportion (%) |
|---------|--------------------|------------------|----------------|
| 20-29   | 729                | 6029             | 12.09          |
| 30-39   | 665                | 6044             | 11.00          |
| 40-49   | 527                | 6060             | 8.70           |
| 50-59   | 524                | 5691             | 9.21           |
| 60-69   | 575                | 5974             | 9.63           |
| 70-79   | 425                | 3730             | 11.39          |
| ≥80     | 446                | 2330             | 19.14          |

**Table S3.** Threshold effect analysis for association of atherogenic coefficient with depression

| Outcomes               | Depression       | P-value |
|------------------------|------------------|---------|
| Model 1, $\beta$ (95%) |                  |         |
| Linear effort model    | 1.04(1.02,1.07)  | 0.002   |
| Model 2, $\beta$ (95%) |                  |         |
| Infection point (K)    | 1.2              |         |
| K <1.2                 | 0.54 (0.29,1.03) | 0.059   |
| 1.2 >K                 | 1.05 (1.02,1.08) | <0.001  |
| LLR                    | 0.051            |         |

**Table S4.** Results of collinearity detection

| Mode |             | Unstandardized |                | Standardized | t      | Significance | Collinearity |       |
|------|-------------|----------------|----------------|--------------|--------|--------------|--------------|-------|
|      |             | Coefficients   |                |              |        |              | Statistics   |       |
| 1    |             | B              | Standard Error |              |        |              | Tolerance    | VIF   |
| 1    | Constant    | -0.067         | 0.01           |              | -6.668 | 0            |              |       |
|      | AC          | 0.002          | 0.002          | 0.01         | 1.089  | 0.276        | 0.153        | 6.524 |
|      | HDL         | -0.002         | 0.006          | -0.003       | -0.349 | 0.727        | 0.193        | 5.177 |
|      | cholesterol |                |                |              |        |              |              |       |
|      | TC          | -0.001         | 0.002          | -0.002       | -0.312 | 0.755        | 0.269        | 3.723 |
|      | HbA1c       | 0.001          | 0.001          | 0.004        | 0.973  | 0.33         | 0.936        | 1.068 |

Dependent Variable: Depression.

Abbreviations: AC, atherogenic coefficient; HDL, high-density lipoprotein; TC, total cholesterol; HbA1c, glycosylated hemoglobin.
